# Supplementary material for: Identification of a novel BET bromodomain inhibitor-sensitive, gene regulatory circuit that controls Rituximab response and tumour growth in aggressive lymphoid cancers
Source: PubMed Central journal article supplement (PMC3944460; doi:10.1002/emmm.201202034), 2013-07-04
Supplement: emmm0005-1180-SD1.pdf [file emmm0005-1180-SD1.pdf]

## SUPPORTING INFORMATION

### Table of contents

|                                                                                                                                                                                      |           |
|--------------------------------------------------------------------------------------------------------------------------------------------------------------------------------------|-----------|
| <b>Supplemental Methods</b>                                                                                                                                                          | <b>2</b>  |
| <b>Supplemental Figures</b>                                                                                                                                                          | <b>3</b>  |
| <b>Figure S1:</b> Proteomic analysis of a DLBCL nuclear acid soluble (NAS) fraction and identification of nuclear factors which show evidence of abnormal de-repression in lymphoma. | <b>3</b>  |
| <b>Figure S2:</b> Association of <i>H2AFY</i> and <i>CYCLON</i> levels with clinical outcome in DLBCL.                                                                               | <b>4</b>  |
| <b>Figure S3:</b> Establishment of <i>CYCLON</i> knock-down lymphoma cell lines.                                                                                                     | <b>5</b>  |
| <b>Figure S4:</b> Differential expression of genes in <i>CYCLON</i> knock-down Raji lymphoma B cells.                                                                                | <b>6</b>  |
| <b>Figure S5:</b> Evaluation of drug sensitivity in <i>CYCLON</i> knock-down B lymphoma cells.                                                                                       | <b>7</b>  |
| <b>Figure S6:</b> Characterization of JQ1 final compound.                                                                                                                            | <b>8</b>  |
| <b>Figure S7:</b> Cell death assays upon JQ1 and JQ1/etoposide treatment.                                                                                                            | <b>9</b>  |
| <b>Supplemental Tables</b>                                                                                                                                                           | <b>10</b> |
| <b>Table S1:</b> Protein list from LC-MS/MS analysis of B593 NAS fraction.                                                                                                           | <b>10</b> |
| <b>Table S2:</b> Genes significantly modulated between Raji shCtrl and Raji sh <i>CYCLON</i> cell lines.                                                                             | <b>12</b> |
| <b>Table S3:</b> GSEA “Aggressive multiple myeloma” signature.                                                                                                                       | <b>32</b> |
| <b>Table S4:</b> GSEA “CD40 dependent B cell” signature.                                                                                                                             | <b>33</b> |
| <b>Table S5:</b> Oligonucleotides used for this study.                                                                                                                               | <b>34</b> |

## **SUPPLEMENTAL METHODS**

### **Antibody-Dependent Cell-Mediated Cytotoxicity assay**

For Antibody-Dependent Cell-Mediated Cytotoxicity assay (ADCC),  $10^6$  target cells were labelled with 125  $\mu\text{Ci}$   $^{51}\text{Cr}$  by incubating for 1 h at 37°C. After washing, labeled cells were resuspended in regular culture medium. PBMC prepared by centrifugation on a Ficoll density gradient from healthy donors' venous blood were used as effector cells. Briefly,  $10^5$  target cells were mixed with PBMC at effector:target ratios of 50:1, 25:1 or 12.5:1, with 10  $\mu\text{g/ml}$  of Rituximab or Herceptin (as control isotype). After 4-h incubation in humidified atmosphere of 95% air and carbon dioxide, the  $^{51}\text{Cr}$ -release was determined in the formula  $100 \times (E-S)/(T-S)$ , where E is the cpm released in the presence of effector cells, T is the cpm released after target cells incubation with 1% saponin, and S is the cpm spontaneously released by target cells incubated with medium alone.

**A.**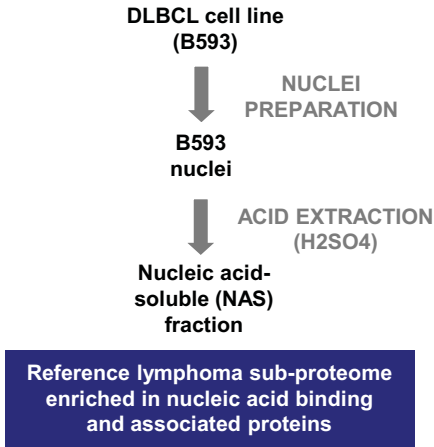**B.**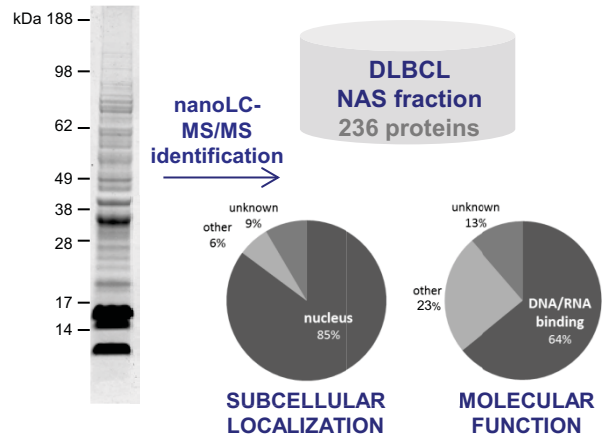**C.**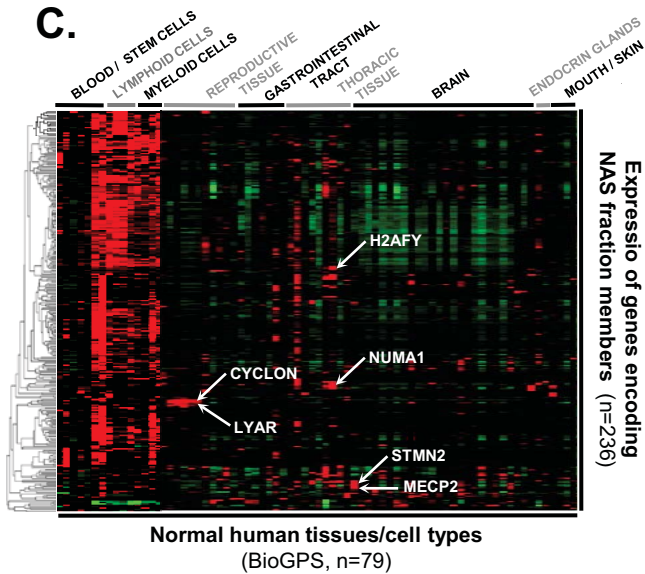**D.**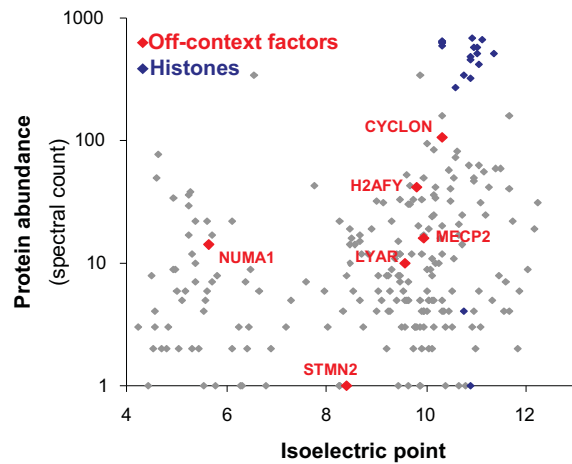

**Figure S1 - Proteomic analysis of a DLBCL nuclear acid soluble (NAS) fraction and identification of nuclear factors which show evidence of abnormal de-repression in lymphoma.**

**A.** Experimental strategy for B593 DLBCL cell line NAS fraction extraction, **B.** SDS-PAGE separation of NAS fraction proteins from the DLBCL cell line (left) and number, subcellular localization and molecular function of proteins identified by mass spectrometry from this fraction (right). **C.** Heat-map of physiological gene expression profiles (79 tissues comprising both lymphoid and non-lymphoid) for genes encoding the 236 factors identified by mass-spectrometry in the NAS fraction of B593 DLBCL cells (retrieved from BioGPS portal). “Off-context” factors are indicated (white arrows). **D.** Relative abundance (retrieved from spectral counts) and isoelectric point of all NAS fraction proteins including “off-context” factors (red) and core histones (blue).

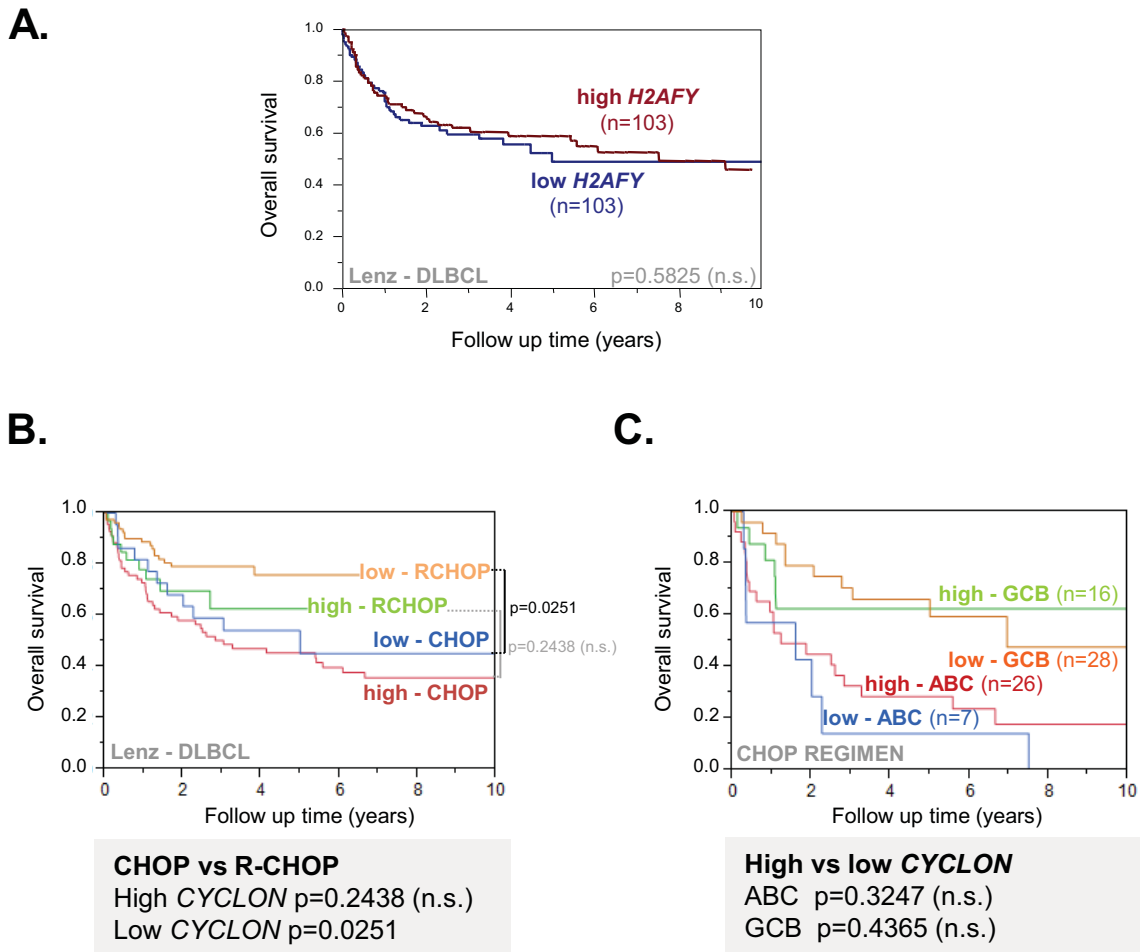

**Figure S2 - Association of *H2AFY* and *CYCLON* levels with clinical outcome in DLBCL.**

Kaplan-Meier cumulative survival curves showing predicted survival in DLBCL patients from the Lenz (GEO GSE10846) study, as indicated. **A.** R-CHOP and CHOP-treated patients with high (above 3<sup>rd</sup> quartile) or low (below 1<sup>st</sup> quartile) *H2AFY* expression levels. **B.** R-CHOP or CHOP-treated patients with high (above 3<sup>rd</sup> quartile) or low (below 1<sup>st</sup> quartile) *CYCLON* expression levels. **C.** CHOP-treated patients with high (above 3<sup>rd</sup> quartile) or low (below 1<sup>st</sup> quartile) *CYCLON* expression levels according to DLBCL molecular subtype (ABC or GCB), p value from log-rank test ; n.s. : non significant.

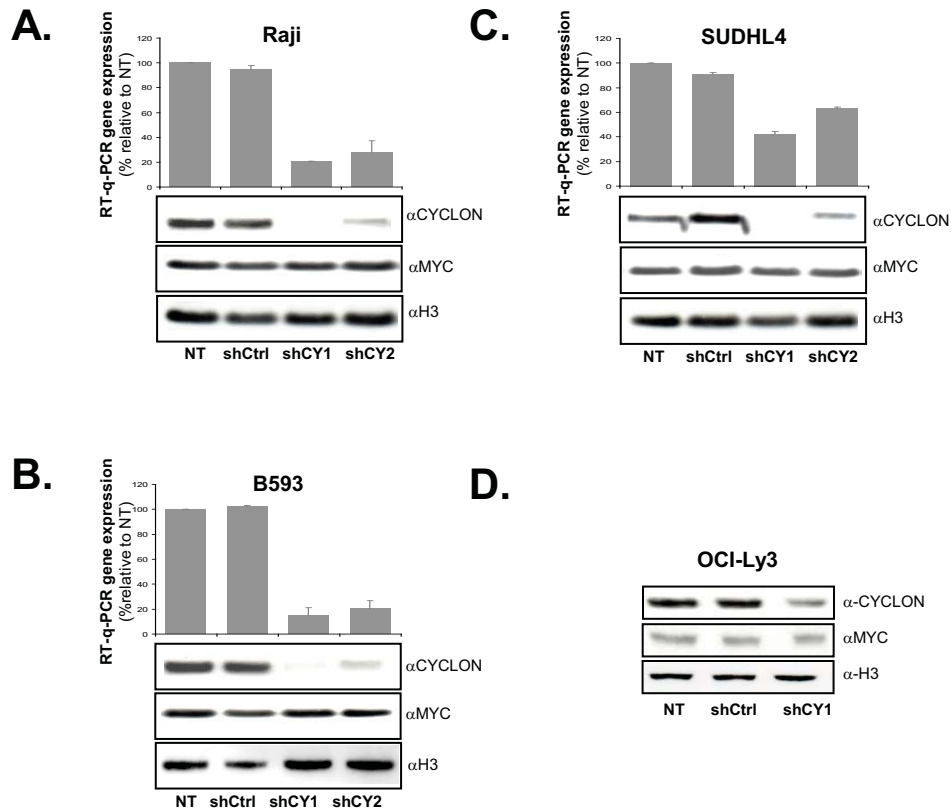

**Figure S3 - Establishment of CYCLON knock-down lymphoma cell lines.**

Expression analysis by RT-qPCR (*CYCLON*) and western blotting (*CYCLON*, *MYC* and histone H3, lower panels), as indicated, in Raji (**A**), B593 (**B**), SUDHL4 (**C**) and OCI-Ly3 (**D**) cell lines non transduced (NT), transduced with a non-targeting shRNA (shCtrl), or transduced with *CYCLON*-targeting shRNA (shCY1 = sh*CYCLON* and CY2) ; n=3

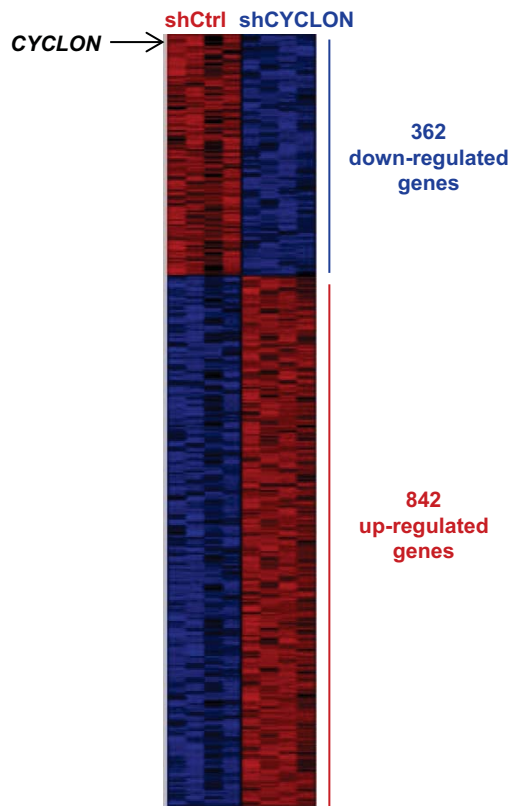

**Figure S4 - Differential expression of genes in CYCLON knock-down Raji lymphoma B cells.**

Heatmap showing differential expression of genes in shCtrl (n=4 biological replicates) or shCYCLON-treated (n=4 biological replicates) Raji B lymphoma cells (unpaired t-test with Benjamini Hochberg correction, corrected p value <0.05, fold change  $\geq 1.2$ ); see also Table S2.

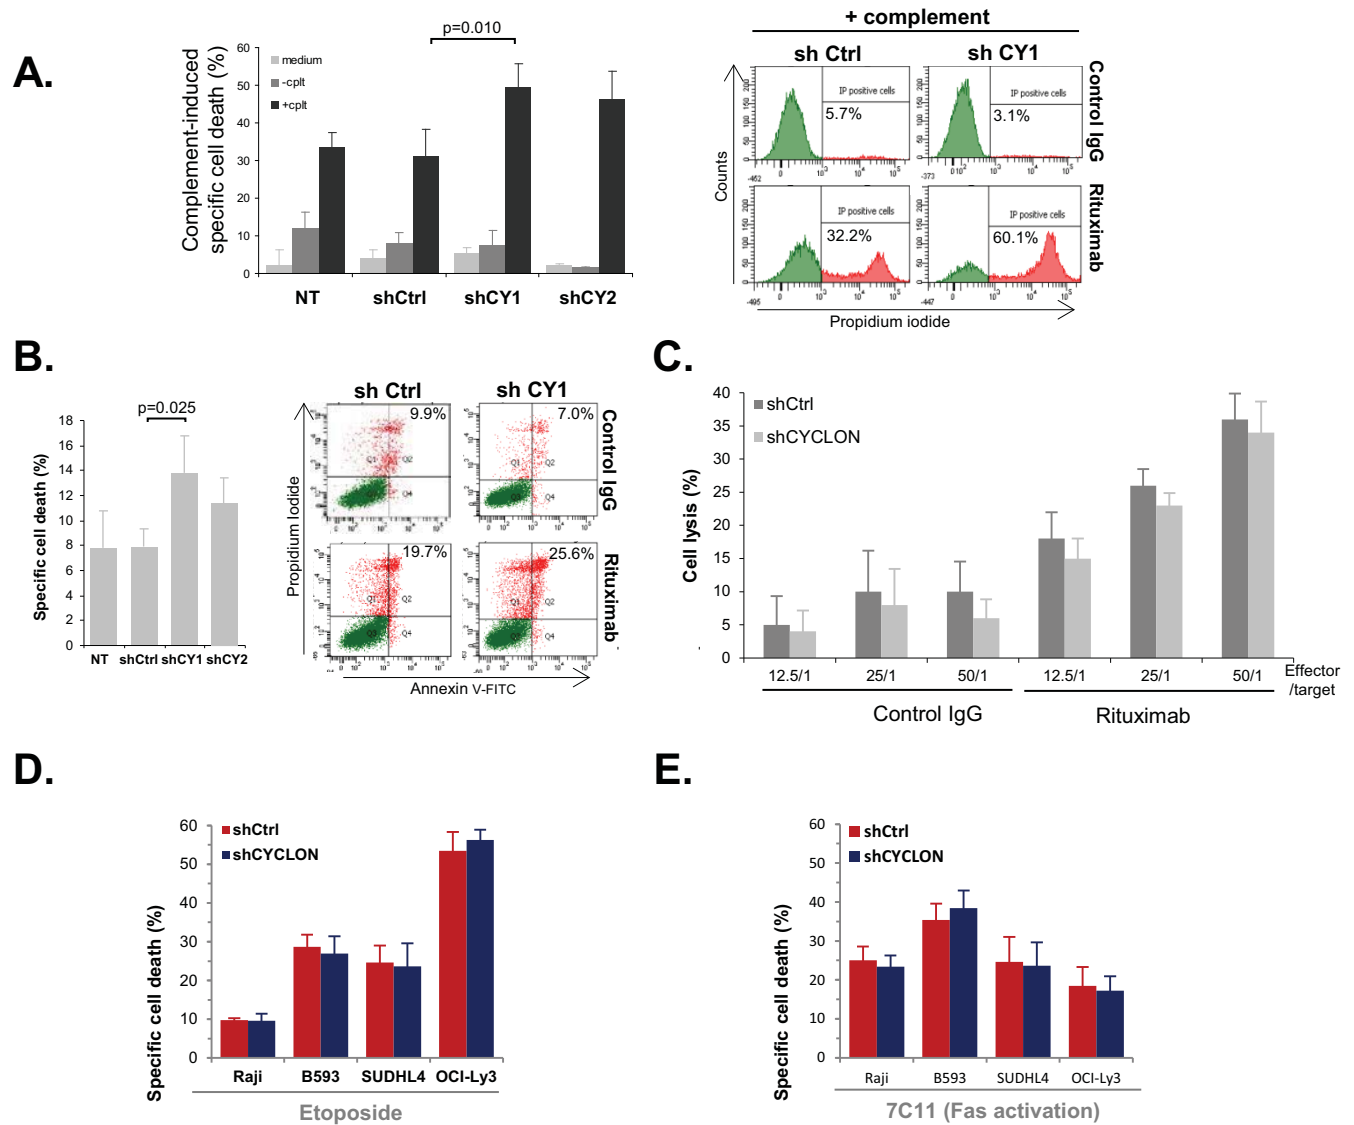

**Figure S5 - Evaluation of drug sensitivity in CYCLON knock-down B lymphoma cells.**

**A-C.** Evaluation of Raji sensitivity to Rituximab for non transduced cells (NT), cells transduced with a non-targeting shRNA (shCtrl), or cells transduced with two different CYCLON targeting shRNA (shCY1 and CY2), respectively. **A.** CDC assays after 1  $\mu$ g/ml Rituximab or control IgG (Herceptin) treatment for 1h, in the presence or absence of human complement. Typical flow cytometry results using propidium iodide staining for shCtrl and shCY1 in Raji cells. **B.** Rituximab-induced apoptosis assays with 10  $\mu$ g/ml Rituximab or control IgG (Herceptin) for 24h. Typical flow cytometry results using Annexin V / propidium iodide staining for shCtrl and shCY1 in Raji cells, p values are derived from a Wilcoxon test, n=8 for each cell line. **C.** ADCC  $^{51}$ Cr release assay in Raji cells: non transduced (NT), transduced with a non-targeting shRNA (shCtrl), or CYCLON-targeting shRNA (shCYCLON); treated with 10  $\mu$ g/ml of Rituximab or Herceptin (as a control isotype); and with peripheral blood mononuclear cells (PBMC) at effector:target ratios of 50:1, 25:1 or 12.5:1 for 4h as described in Supplemental Methods section. **D-E.** Evaluation of etoposide (**D**) and Fas-dependant apoptosis (**E**) of Raji, B593, SUDHL4 and OCI-Ly3 cells transduced with a non-targeting shRNA (shCtrl) or with a CYCLON-targeting shRNA (shCYCLON), after a 24h treatment with 20 nM etoposide or DMSO and 1  $\mu$ g/ml anti-FAS (7C11) or control IgG antibodies ; p values are derived from a Wilcoxon test, n=8 for each cell line.

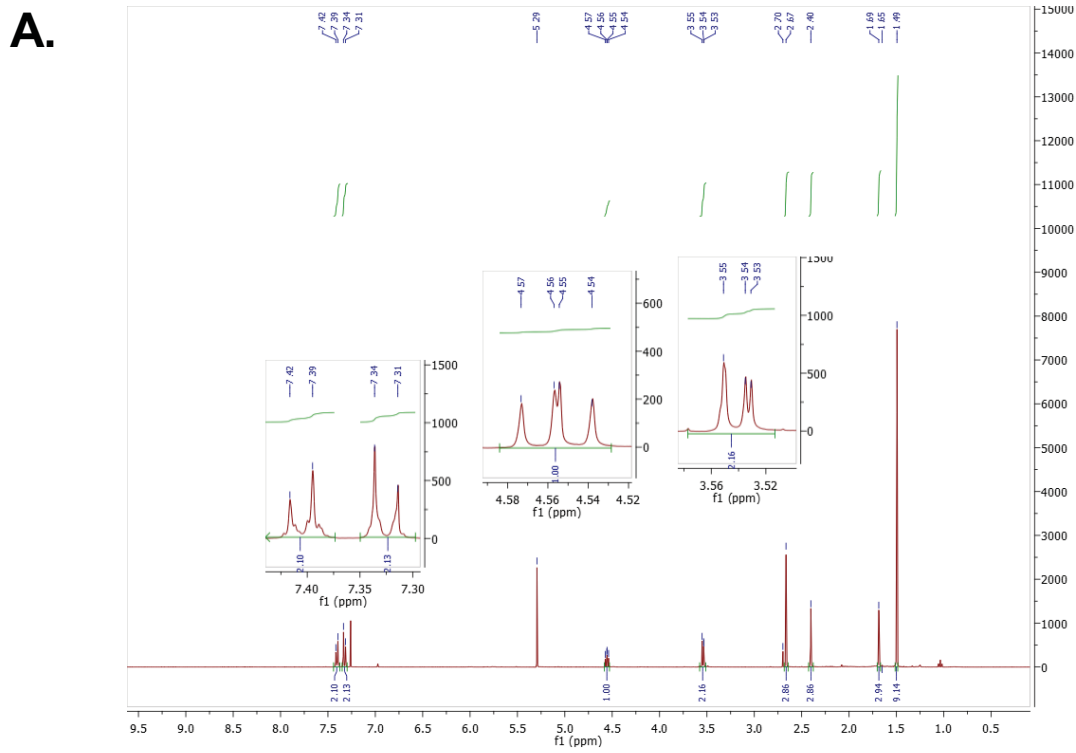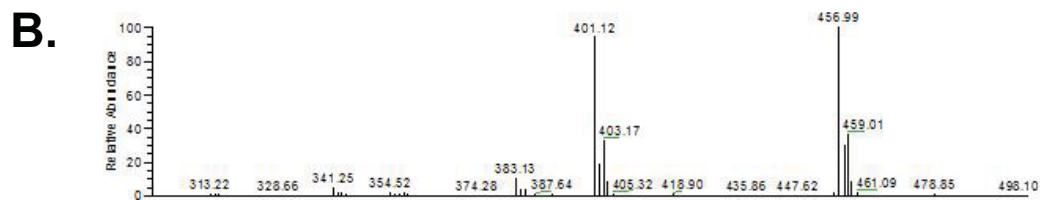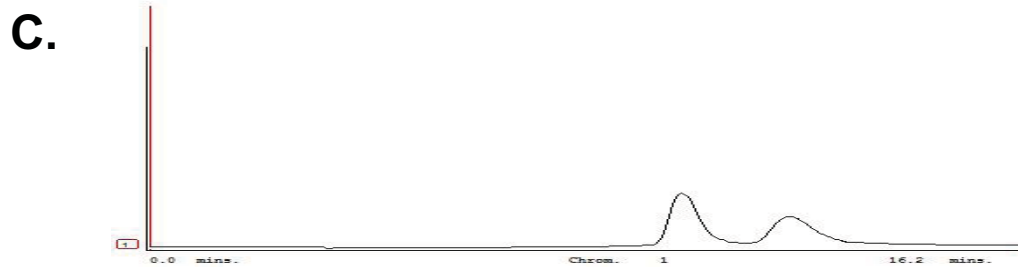

**Figure S6 - Characterization of JQ1 final compound**

**A.**  $^1\text{H}$  NMR spectra ( $\text{CDCl}_3$ , 400MHz, 25°C):  $\delta$  7.39 (d,  $J$  = 8.5 Hz, 2H), 7.31 (d,  $J$  = 8.4 Hz, 2H), 4.55 (dd,  $J^1$  = 6.5 Hz,  $J^2$  = 8 Hz, 1H), 3.54 (dd,  $J^1$  = 6.5 Hz,  $J^2$  = 8 Hz, 2H), 2.67 (s, 3H), 2.40 (s, 3H), 1.69 (s, 3H), 1.49 (s, 9H). Consistent with literature values:  $^1\text{H}$  NMR (600 MHz,  $\text{CDCl}_3$ , 25 °C)  $\delta$  7.39 (d,  $J$  = 8.4 Hz, 2H), 7.31 (d,  $J$  = 8.4 Hz, 2H), 4.54 (t,  $J$  = 6.6 MHz, 1H), 3.54-3.52 (m, 2H), 2.66 (s, 3H), 2.39 (s, 3H), 1.67 (s, 3H), 1.48 (s, 9H). **B.** Low Resolution Mass Spectrometry ( $m/z$ ) of final sample (+ESI). 456.99 [M+H], 401.12 fragmentation peak [M – tBu]. **C.** HPLC trace – analytical chiral column OD-H; *n*-hexane:2-propanol 85:15; (+)-JQ1 r.t.: 10 min, 55%, (-)-JQ1 r.t.: 12 min, 45%.



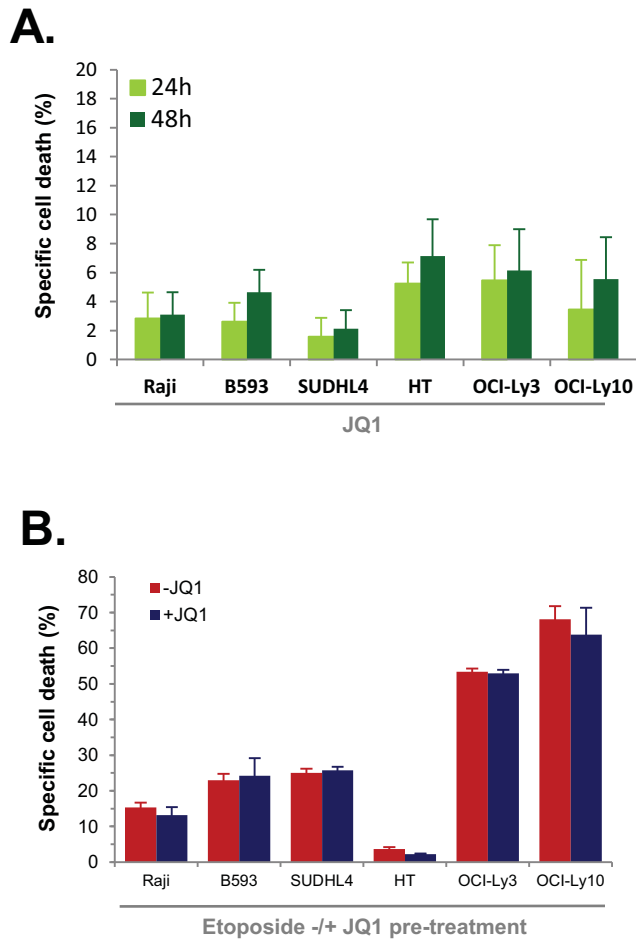

**Figure S7 – Cell death assays upon JQ1 and JQ1/etoposide treatment.**

**A.** Evaluation of specific cell death after a 24h or 48h treatment with 1  $\mu$ M JQ1 or vehicle (DMSO), Specific cell death =  $[\text{JQ1-DMSO}]/(100\text{-DMSO}) \times 100$ , n=4 for each cell line. **B.** Evaluation of specific cell death after a 24h pre-treatment with 1  $\mu$ M JQ1 or vehicle (DMSO) followed by a 24h treatment with 20  $\mu$ M etoposide or vehicle (DMSO), Specific cell death =  $[\text{etoposide-DMSO}]/(100\text{-DMSO}) \times 100$  ; n=4 for each cell line.



|     |                                                        |                 |        |                      |              |       |       |   |   |       |                                        |                                                         |               |                     |
|-----|--------------------------------------------------------|-----------------|--------|----------------------|--------------|-------|-------|---|---|-------|----------------------------------------|---------------------------------------------------------|---------------|---------------------|
| 181 | (P23284) Puffyly-prail cis-trans isomerase B prec      | PHB_HUMAN       | P23284 | PPB/CYPB             | 180.37       | 22728 | 17.48 | 4 | 4 | 9.25  | other, metabolic enzyme, dehydrogenase | protein binding                                         | ER, cytoplasm | nucleus             |
| 182 | (Q8WY13) RNA-binding protein 28 (RNA-binding mo        | LOC101928_HUMAN | Q8WY13 | RMB28                | 72.995807    | 85554 | 2.83  | 4 | 4 | 9.27  | RNA binding                            | ribosome biogenesis                                     | nucleus       | cytoplasm           |
| 183 | (P93195) Chromosome protein homolog 1 (Plectone        | LOC101928_HUMAN | P93195 | CBK1/CBK             | 124.0786989  | 21405 | 8.25  | 1 | 3 | 4.85  | other, protein binding                 | chromatin organization, transcription (-)               | nucleus       | cytoplasm           |
| 184 | (Q6DKN1) Ribosomal protein L7a1a 7                     | LOC101928_HUMAN | Q6DKN1 | RPL7L1               | 61.96099517  | 28843 | 3.85  | 1 | 3 | 10.51 | unknown                                | unknown                                                 | nucleus       | cytoplasm           |
| 185 | (P08441) ATP synthase C1 subunit, mitochondrial pm     | ATP10_HUMAN     | P08441 | ATP8A2/ATP8          | 62.47        | 23383 | 9.48  | 2 | 3 | 9.81  | other, transporter                     | cell metabolism                                         | mitochondrion | cytoplasm           |
| 186 | (Q8N82) Protein C2orf70                                | LOC101928_HUMAN | Q8N82  | C2orf70/PRED54       | 103.27       | 25441 | 10.39 | 2 | 3 | 11.07 | unknown                                | unknown                                                 | nucleus       | cytoplasm           |
| 187 | (P16993) DNA-binding protein subunit C/EBP delta domai | LOC101928_HUMAN | P16993 | C/EBPD/DBP           | 115.19       | 40566 | 10.22 | 2 | 3 | 9.77  | DNA binding                            | transcription (-)                                       | nucleus       | cytoplasm           |
| 188 | (Q8VY03) MDS17 FHL domain-interacting nuclear          | LOC101928_HUMAN | Q8VY03 | MDS17                | 124.6409952  | 34201 | 7.74  | 2 | 3 | 9.88  | RNA binding                            | ribosome biogenesis                                     | nucleus       | cytoplasm           |
| 189 | (P16760) NRP2-like protein 1 (High mobility group1)    | LOC101928_HUMAN | P16760 | NRP2L1               | 110.1        | 14034 | 18.11 | 2 | 3 | 8.72  | RNA binding                            | ribosome biogenesis, RNA editing                        | nucleus       | cytoplasm           |
| 190 | (Q8WY13) RNA-binding protein 28 (RNA-binding mo        | LOC101928_HUMAN | Q8WY13 | RMB28                | 72.995807    | 85554 | 2.83  | 4 | 4 | 9.27  | RNA binding                            | ribosome biogenesis, telomere maintenance               | nucleus       | cytoplasm           |
| 191 | (Q83328) Testis-specific gene 118 protein              | LOC101928_HUMAN | Q83328 | TSG118               | 94.24881774  | 21029 | 11.79 | 2 | 3 | 9.58  | unknown                                | unknown                                                 | nucleus       | cytoplasm           |
| 192 | (Q02012) 245 proteasome nonATPase regulator 1          | LOC101928_HUMAN | Q02012 | PRMD9                | 125.64       | 24038 | 9.87  | 2 | 3 | 6.46  | other, protein binding                 | protein targeting and degradation                       | nucleus       | cytoplasm           |
| 193 | (P02626) GTP-binding nuclear protein (GTPase           | LOC101928_HUMAN | P02626 | ARAA2/OKSW-dB1       | 68.07099517  | 24277 | 10.00 | 2 | 3 | 7.2   | DNA/RNA/protein binding                | chromatin organization                                  | nucleus       | cytoplasm           |
| 194 | (P05851) 40S ribosomal protein S20                     | LOC101928_HUMAN | P05851 | RP20                 | 78.73        | 13364 | 18.21 | 2 | 3 | 8.82  | structural component of ribosome       | protein biosynthesis                                    | nucleus       | cytoplasm           |
| 195 | (Q01155) Protein SET (Phosphatase 2A inhibitor 12      | SET_HUMAN       | Q01155 | SET                  | 117.2        | 33489 | 7.57  | 2 | 3 | 4.23  | other, protein binding                 | chromatin organization                                  | nucleus       | cytoplasm, ER       |
| 196 | (Q07959) Splicing factor, arginine/leucine-rich 1 (spe | SF2L1_HUMAN     | Q07959 | SF2L1                | 69.49880887  | 27587 | 7.60  | 2 | 3 | 10.37 | RNA binding                            | RNA processing                                          | nucleus       | cytoplasm           |
| 197 | (P05221) T-complex protein 1 subunit alpha (TDP-4      | TDP43_HUMAN     | P05221 | CTSLA/CTSL, COTZ     | 88.78699887  | 9787  | 3.82  | 2 | 3 | 8.82  | other, protein binding                 | transcription, RNA processing                           | nucleus       | cytoplasm           |
| 198 | (Q8MNP1) ATP-dependent RNA helicase DDX18 (E           | LOC101928_HUMAN | Q8MNP1 | DDX18                | 83.29099517  | 75359 | 4.82  | 3 | 3 | 9.52  | RNA binding, helicase                  | transcription                                           | nucleus       | cytoplasm           |
| 199 | (Q02945) Far upstream element-binding protein 1 (F     | FEF1_HUMAN      | Q02945 | HNF9B/PBP2           | 125.14       | 72864 | 5.00  | 3 | 3 | 8.82  | DNA/RNA binding                        | transcription, RNA processing                           | nucleus       | cytoplasm           |
| 200 | (Q13601) HIV-1 Rev-binding protein 2 (Rev-interac      | HRSB_HUMAN      | Q13601 | HR11/HRSB2           | 108.848801   | 43507 | 5.82  | 3 | 3 | 9.78  | RNA binding                            | RNA processing                                          | nucleus       | cytoplasm           |
| 201 | (P12004) Proliferating cell nuclear antigen (PCNA) (   | LOC101928_HUMAN | P12004 | PCNA                 | 218.18       | 28750 | 13.03 | 3 | 3 | 4.57  | DNA binding                            | cell proliferation, cell cycle, DNA repair, replication | nucleus       | cytoplasm           |
| 202 | (P04751) 40S ribosomal protein S10                     | LOC101928_HUMAN | P04751 | RP10                 | 142.4786989  | 18886 | 19.30 | 3 | 3 | 10.15 | structural component of ribosome       | protein biosynthesis                                    | nucleus       | cytoplasm           |
| 203 | (P07108) Arg-Cys-lysine nuclear protein (ACBP) (Dnaa5  | ACBP_HUMAN      | P07108 | DB                   | 92.94099517  | 9907  | 14.44 | 1 | 2 | 6.11  | other, metabolic enzyme, dehydrogenase | cell metabolism                                         | nucleus       | cytoplasm           |
| 204 | (Q8NDC0) Protein C14orf52                              | C14orf52_HUMAN  | Q8NDC0 | C14orf52             | 75.15099517  | 24122 | 7.78  | 1 | 2 | 5.3   | unknown                                | unknown                                                 | nucleus       | cytoplasm           |
| 205 | (Q15607) Nucleophosmin-3                               | NPM3_HUMAN      | Q15607 | NPM3                 | 88.78698887  | 18200 | 9.20  | 1 | 2 | 4.55  | other, protein binding                 | chromatin organization                                  | nucleus       | cytoplasm           |
| 206 | (Q8H44) Polystyrene-binding protein 2 (PhyAIP1         | LOC101928_HUMAN | Q8H44  | PBP1/PAB2, PABP2     | 78.38580887  | 32598 | 5.41  | 1 | 2 | 5.64  | RNA binding                            | RNA processing                                          | nucleus       | cytoplasm           |
| 207 | (Q8N82) Hypothetical protein C1orf174                  | LOC101928_HUMAN | Q8N82  | C1orf174             | 98.96        | 26018 | 8.73  | 1 | 2 | 6.9   | unknown                                | unknown                                                 | nucleus       | cytoplasm           |
| 208 | (P46776) 60S ribosomal protein L27a                    | LOC101928_HUMAN | P46776 | RPL27A               | 119.94       | 16420 | 5.92  | 1 | 2 | 11    | structural component of ribosome       | protein biosynthesis                                    | nucleus       | cytoplasm           |
| 209 | (P02306) Small nuclear ribonucleoprotein F (snRNP      | LOC101928_HUMAN | P02306 | SNRPF/PBFCF          | 92.91        | 9719  | 14.77 | 1 | 2 | 4.7   | RNA binding                            | RNA processing                                          | nucleus       | cytoplasm           |
| 210 | (P02316) Small nuclear ribonucleoprotein Sm D2 (s      | LOC101928_HUMAN | P02316 | SNRPO/SMRPO1         | 74.56099517  | 13518 | 13.11 | 1 | 2 | 9.92  | RNA binding                            | RNA processing                                          | nucleus       | cytoplasm           |
| 211 | (P15811) 14-3-3 protein gamma (Protein kinase C a      | LOC101928_HUMAN | P15811 | YIVW0                | 65.57099517  | 28154 | 6.87  | 2 | 2 | 4.8   | other, protein binding                 | signal transduction, apoptosis (-), cell cycle          | nucleus       | nucleus             |
| 212 | (P13630) Elongation factor 2 (EF-2)                    | EF2_HUMAN       | P13630 | EF2/EF2              | 52.08        | 95148 | 21.21 | 2 | 2 | 6.42  | other, protein binding                 | transcription                                           | nucleus       | mitochondrion       |
| 213 | (P18848) Siva-70 protein, mitochondrial precursor      | LOC101928_HUMAN | P18848 | HSP6A/GRP75, HSP6A8  | 89.4         | 73635 | 13.79 | 2 | 2 | 5.44  | other, protein binding                 | protein folding, apoptosis (-)                          | nucleus       | mitochondrion       |
| 214 | (Q15252) Transcription factor MafK (Erythroid trans    | LOC101928_HUMAN | Q15252 | MAFK                 | 121.84       | 17939 | 13.58 | 2 | 2 | 10.04 | DNA/protein binding                    | transcription, cell cycle                               | nucleus       | cytoplasm           |
| 215 | (Q68670) Transcription factor MafK (Erythroid trans    | LOC101928_HUMAN | Q68670 | MAFK                 | 79.07        | 17512 | 12.58 | 2 | 2 | 10.1  | DNA/protein binding                    | transcription                                           | nucleus       | cytoplasm           |
| 216 | (Q04906) Polyomavirus non-binding protein 1 (PTP       | LOC101928_HUMAN | Q04906 | PTPBP1/PTB           | 67.78099517  | 67186 | 4.24  | 2 | 2 | 9.22  | RNA binding                            | RNA processing                                          | nucleus       | cytoplasm           |
| 217 | (P04782) 40S ribosomal protein S5                      | LOC101928_HUMAN | P04782 | RP5S                 | 63.41        | 22731 | 8.25  | 2 | 2 | 9.73  | structural component of ribosome       | protein biosynthesis                                    | nucleus       | cytoplasm           |
| 218 | (Q15026) Splicing factor, arginine/leucine-rich 1 (spe | SF2L1_HUMAN     | Q15026 | SF2L1                | 68.51        | 27350 | 8.68  | 2 | 2 | 11.85 | RNA binding                            | RNA processing                                          | nucleus       | cytoplasm           |
| 219 | (Q83665) Slamin-2 (SDG19 protein) (Slamin-2 cor        | LOC101928_HUMAN | Q83665 | STMN2/SCG10, SCG10   | 109.3709952  | 20815 | 10.58 | 1 | 1 | 8.4   | other, protein binding                 | cell structure                                          | cytoplasm     | nucleus             |
| 220 | (Q86FF9) Sorcin (Cell division cycle-associated pr     | LOC101928_HUMAN | Q86FF9 | CCDC                 | 88.99        | 27583 | 5.60  | 1 | 1 | 9.65  | other, protein binding                 | chromatin organization, cell cycle                      | nucleus       | cytoplasm (mitosis) |
| 221 | (P13028) Cdc16-1 (Cdc16, non-muscle isoform) (18       | C16P1_HUMAN     | P13028 | C16P1/C16L1          | 78.86099517  | 18300 | 7.23  | 1 | 1 | 8.28  | other, protein binding                 | cell structure                                          | mitochondrion | nucleus, cytoplasm  |
| 222 | (P14854) Cytochrome c oxidase subunit VIIb isoform     | LOC101928_HUMAN | P14854 | COX8B1/COX8B         | 175.3609952  | 10055 | 28.37 | 1 | 1 | 6.79  | other, transporter                     | cell metabolism                                         | nucleus       | cytoplasm           |
| 223 | (P18919) Probable ATP-dependent RNA helicase D         | LOC101928_HUMAN | P18919 | EF4A4/DDX48, XIA0111 | 95.7841202   | 48710 | 5.80  | 1 | 1 | 6.33  | RNA binding, helicase                  | transcription                                           | nucleus       | cytoplasm           |
| 224 | (Q72818) Hypothetical protein C6orf24                  | C6orf24_HUMAN   | Q72818 | C6orf24              | 80.91        | 20119 | 7.89  | 1 | 1 | 9.87  | unknown                                | unknown                                                 | nucleus       | cytoplasm           |
| 225 | (Q83440) HGA                                           | LOC101928_HUMAN | Q83440 | HST1G4P/HA-HGA       | 74.13        | 12648 | 8.69  | 1 | 1 | 10.9  | unknown                                | unknown                                                 | nucleus       | cytoplasm           |
| 226 | (Q8N82) Hypothetical protein C13orf43                  | LOC101928_HUMAN | Q8N82  | C13orf43             | 71.84        | 28240 | 8.25  | 1 | 1 | 9.44  | unknown                                | unknown                                                 | nucleus       | cytoplasm           |
| 227 | (Q8BRT6) Hypothetical protein C12orf31 (CDNA FL        | LOC101928_HUMAN | Q8BRT6 | C12orf31             | 128.33       | 15215 | 15.24 | 1 | 1 | 10.38 | unknown                                | unknown                                                 | nucleus       | cytoplasm           |
| 228 | (Q83871) 60S acidic ribosomal protein P0 (60S-80       | LOC101928_HUMAN | Q83871 | RPLP0/D15224/E, RPP2 | 74.07        | 11568 | 11.43 | 1 | 1 | 4.42  | structural component of ribosome       | protein biosynthesis                                    | nucleus       | cytoplasm           |
| 229 | (Q91290) DNA-directed RNA polymerase I subunit I       | LOC101928_HUMAN | Q91290 | POLR1B               | 65.38099517  | 15227 | 7.25  | 1 | 1 | 5.55  | DNA binding                            | transcription                                           | nucleus       | cytoplasm           |
| 230 | (P02341) 40S ribosomal protein S24                     | LOC101928_HUMAN | P02341 | RPS24                | 60.78098887  | 15413 | 5.71  | 1 | 1 | 10.79 | structural component of ribosome       | protein biosynthesis                                    | nucleus       | cytoplasm           |
| 231 | (P46458) Signal recognition particle 9 kDa protein (1  | SRP9_HUMAN      | P46458 | SRP9                 | 100.37       | 9974  | 17.78 | 1 | 1 | 8.28  | RNA binding                            | transcription (-)                                       | cytoplasm     | nucleus             |
| 232 | (P16449) Slamin-1 (Phosphoprotein 19) (sp19) (C        | SL1N1_HUMAN     | P16449 | STMN1/LAP18, OP18    | 108.3238177  | 17181 | 12.82 | 1 | 1 | 5.77  | other, protein binding                 | cell structure                                          | cytoplasm     | nucleus             |
| 233 | (Q15685) Surfactant locus protein 6                    | LOC101928_HUMAN | Q15685 | SURF6/SURF-6         | 152.88       | 41426 | 8.24  | 1 | 1 | 10.65 | RNA binding                            | ribosome biogenesis                                     | nucleus       | cytoplasm           |
| 234 | (Q12931) Heat shock protein 70 kDa, mitochondrial      | LOC101928_HUMAN | Q12931 | TRAP1/HSP75          | 84.27        | 80000 | 15.93 | 1 | 1 | 8.28  | other, protein binding                 | protein folding                                         | mitochondrion | cytoplasm           |
| 235 | (P07985) Ubiquitin-proteasome c1, ribosome non-su      | LOC101928_HUMAN | P07985 | USO9P/1              | 135.54099509 | 28933 | 10.78 | 1 | 1 | 6.3   | other, metabolic enzyme, dehydrogenase | cell metabolism                                         | mitochondrion | cytoplasm           |
| 236 | (P18780) Nucleosome sensitive actin-binding protel     | YBX1_HUMAN      | P18780 | YBX1/ABEP1, YB1      | 105.2        | 35772 | 5.85  | 1 | 1 | 9.87  | DNA/RNA binding                        | transcription, RNA processing, cell cycle               | nucleus       | cytoplasm           |

<sup>1</sup>Reviewed from UniProt

**Variable modifications allowed for Mascot searches :**

- acetyl lysine
- dimethyl lysine
- dimethyl histone
- serine and threonine phosphorylation
- protein N-acetylation
- oxidized N-terminal acetylation
- methionine oxidation
- methionine sulfoxide
- cysteic acid

**Table S2:** Genes significantly modulated between Raji shCtrl and Raji shCYCLON cell lines

# Notes : Created from Advanced Analysis operation: significance Analysis.

#Entitylist : 3465r\_ShcyclonvsShCtrl\_FC&gt;= 1.2

#Interpretation : Group\_ShcyclonvsShCtrl

#corrected p-value cut-off:0.05

#Selected Test : T Test unpaired

#p-value computation: Asymptotic

#Multiple Testing Correction: Benjamini-Hochberg

# Technology : Affymetrix.GeneChip.HG-U133\_Plus\_2

| Probe Set ID | Regulation | Gene Symbol                | FC         |
|--------------|------------|----------------------------|------------|
| 1554747_a_at | up         | SEPT2                      | 1.3452525  |
| 210348_at    | up         | SEPT4                      | 1.2318484  |
| 201308_s_at  | up         | SEPT11                     | 1.5969949  |
| 202852_s_at  | up         | AAGAB                      | 1.3515162  |
| 202170_s_at  | up         | AASDHPPT                   | 1.2595851  |
| 1555039_a_at | up         | ABCC4                      | 1.5179213  |
| 213805_at    | up         | ABHD5                      | 1.2745662  |
| 221679_s_at  | up         | ABHD6                      | 1.2033099  |
| 210461_s_at  | up         | ABLIM1                     | 1.3266736  |
| 242081_at    | down       | ACAP1                      | -1.2228346 |
| 234312_s_at  | up         | ACSS2                      | 1.210379   |
| 200727_s_at  | up         | ACTR2                      | 1.6853753  |
| 208223_s_at  | up         | ACVR1B                     | 1.2258034  |
| 207422_at    | down       | ADAM20                     | -1.2314298 |
| 244463_at    | down       | ADAM23                     | -1.2529302 |
| 241446_at    | down       | ADAM28                     | -1.2574718 |
| 1555326_a_at | up         | ADAM9                      | 1.2373784  |
| 229004_at    | down       | ADAMTS15                   | -1.215619  |
| 228911_at    | down       | ADAMTS7                    | -1.2000039 |
| 222117_s_at  | up         | ADCK2                      | 1.2364966  |
| 239530_at    | down       | ADD2                       | -1.2626154 |
| 211491_at    | up         | ADRA1A                     | 1.2238052  |
| 210957_s_at  | up         | AFF2                       | 1.2449454  |
| 205734_s_at  | up         | AFF3                       | 1.2646971  |
| 1565034_s_at | up         | AFF3 /// MLL               | 1.2641628  |
| 213926_s_at  | up         | AGFG1                      | 1.8158666  |
| 207293_s_at  | up         | AGTR2                      | 1.2052976  |
| 243793_at    | down       | AHDC1                      | -1.2500672 |
| 208325_s_at  | up         | AKAP13                     | 1.2306771  |
| 241978_at    | up         | AKR1A1                     | 1.347034   |
| 203809_s_at  | down       | AKT2                       | -1.209167  |
| 203609_s_at  | up         | ALDH5A1                    | 1.3379878  |
| 204290_s_at  | up         | ALDH6A1                    | 1.2529459  |
| 211618_s_at  | down       | ALPI                       | -1.227935  |
| 1553219_a_at | up         | AMMECR1                    | 1.5873324  |
| 206121_at    | down       | AMPD1                      | -1.2286934 |
| 239651_at    | up         | ANAPC5                     | 1.4114015  |
| 205389_s_at  | down       | ANK1                       | -1.2072151 |
| 207950_s_at  | up         | ANK3                       | 1.2679877  |
| 219868_s_at  | up         | ANKFY1                     | 1.2791767  |
| 233292_s_at  | up         | ANKHD1 /// ANKHD1-EIF4EBP3 | 1.4842196  |
| 226663_at    | up         | ANKRD10                    | 1.4403979  |
| 216563_at    | down       | ANKRD12                    | -1.2450268 |
| 231423_s_at  | up         | ANKRD16                    | 1.2168254  |
| 236421_at    | up         | ANKRD45                    | 1.2065878  |
| 219496_at    | down       | ANKRD57                    | -1.2382185 |
| 229128_s_at  | down       | ANP32E                     | -1.2317584 |
| 208816_x_at  | up         | ANXA2P2                    | 1.2402707  |
| 204894_s_at  | down       | AOC3                       | -1.2256814 |
| 230413_s_at  | up         | AP1S2                      | 1.4901165  |

|              |      |                   |            |
|--------------|------|-------------------|------------|
| 1555733_s_at | up   | AP1S3             | 1.4179875  |
| 223237_x_at  | down | AP2A1             | -1.2146109 |
| 219994_at    | up   | APBB1IP           | 1.2727188  |
| 202631_s_at  | up   | APPBP2            | 1.2402741  |
| 214483_s_at  | up   | ARFIP1            | 1.2043763  |
| 228477_at    | up   | ARGLU1            | 1.7832876  |
| 202547_s_at  | up   | ARHGEF7           | 1.2464342  |
| 210649_s_at  | down | ARID1A            | -1.2068951 |
| 225184_at    | up   | ARID1B            | 1.2046044  |
| 231016_s_at  | up   | ARNT              | 1.4634826  |
| 208736_at    | up   | ARPC3             | 1.6490312  |
| 207284_s_at  | down | ASPH              | -1.2005804 |
| 219918_s_at  | down | ASPM              | -1.2408969 |
| 218659_at    | down | ASXL2             | -1.230501  |
| 1558807_at   | up   | ATAD2B            | 1.2740762  |
| 208442_s_at  | up   | ATM               | 1.4249728  |
| 209186_at    | down | ATP2A2            | -1.2545114 |
| 207521_s_at  | up   | ATP2A3            | 1.2174581  |
| 217603_at    | up   | ATP6V0A2          | 1.250147   |
| 214149_s_at  | up   | ATP6V0E1          | 1.5006995  |
| 212384_at    | up   | ATP6V1G2 /// BAT1 | 1.3440068  |
| 1569773_at   | up   | ATP8A1            | 1.4654691  |
| 214594_x_at  | down | ATP8B1            | -1.257413  |
| 211022_s_at  | up   | ATRX              | 1.6874208  |
| 212113_at    | up   | ATXN7L3B          | 1.5715481  |
| 227905_s_at  | down | AZI2              | -1.2240304 |
| 219326_s_at  | up   | B3GNT2            | 1.3589712  |
| 210535_at    | down | B9D1              | -1.2588447 |
| 222780_s_at  | down | BAALC             | -1.2152404 |
| 210125_s_at  | down | BANF1             | -1.2180156 |
| 214201_x_at  | down | BAT2              | -1.2025415 |
| 230618_s_at  | up   | BAT2L2            | 1.5455139  |
| 227896_at    | down | BCCIP             | -1.2400014 |
| 1557258_a_at | up   | BCL10             | 1.2613658  |
| 203684_s_at  | up   | BCL2              | 1.3407803  |
| 224227_s_at  | up   | BDP1              | 1.3714335  |
| 220451_s_at  | down | BIRC7             | -1.2500215 |
| 226853_at    | down | BMP2K             | -1.2142243 |
| 210523_at    | down | BMPR1B            | -1.3424524 |
| 210214_s_at  | up   | BMPR2             | 1.344528   |
| 204930_s_at  | up   | BNIP1             | 1.2533311  |
| 235009_at    | up   | BOD1L             | 1.7748537  |
| 232698_at    | up   | BPIL1             | 1.237938   |
| 41512_at     | down | BRAP              | -1.2698414 |
| 222737_s_at  | down | BRD7              | -1.2065537 |
| 206787_at    | down | BRDT              | -1.21183   |
| 218954_s_at  | down | BRF2              | -1.2064899 |
| 240362_at    | up   | BRP44L            | 1.3525517  |
| 1553252_a_at | up   | BRWD3             | 1.3571057  |
| 201235_s_at  | up   | BTG2              | 1.3849775  |
| 215509_s_at  | up   | BUB1              | 1.3521194  |
| 209182_s_at  | up   | C10orf10          | 1.2326845  |
| 229399_at    | up   | C10orf118         | 1.6101971  |
| 227136_s_at  | down | C10orf46          | -1.2587973 |
| 239998_at    | up   | C10orf53          | 1.2944402  |
| 227099_s_at  | down | C11orf96          | -1.2407529 |
| 227152_at    | up   | C12orf35          | 1.4074843  |
| 229778_at    | up   | C12orf39          | 1.2305417  |
| 226349_at    | down | C12orf45          | -1.2465434 |
| 227928_at    | down | C12orf48          | -1.2019851 |
| 236853_at    | down | C13orf16          | -1.2512114 |

|              |      |                       |            |
|--------------|------|-----------------------|------------|
| 231859_at    | up   | C14orf132             | 1.2126943  |
| 237640_at    | up   | C14orf138             | 1.3045775  |
| 224798_s_at  | up   | C15orf17              | 1.2529098  |
| 221300_at    | down | C15orf2               | -1.2586917 |
| 231338_at    | up   | C15orf55              | 1.2323191  |
| 225088_at    | up   | C16orf63              | 1.4222207  |
| 213815_x_at  | down | C19orf29              | -1.221676  |
| 232730_at    | down | C19orf44              | -1.2715486 |
| 212574_x_at  | up   | C19orf6               | 1.6493751  |
| 219439_at    | down | C1GALT1               | -1.2167912 |
| 238365_s_at  | up   | C1orf228              | 1.2860056  |
| 223459_s_at  | down | C1orf56               | -1.2008423 |
| 222301_at    | up   | C1orf61               | 1.2541444  |
| 202953_at    | up   | C1QB                  | 1.2004935  |
| 205575_at    | up   | C1QL1                 | 1.2549008  |
| 223499_at    | up   | C1QTNF5 /// MFRP      | 1.2410158  |
| 232619_at    | down | C20orf134             | -1.2012147 |
| 234002_at    | down | C20orf135             | -1.2864715 |
| 231991_at    | up   | C20orf160             | 1.220118   |
| 1559252_a_at | down | C20orf29              | -1.2932229 |
| 227867_at    | up   | C2orf89               | 1.2594761  |
| 225279_s_at  | up   | C3orf17               | 1.310732   |
| 224273_at    | down | C3orf20               | -1.2145138 |
| 1569374_at   | up   | C3orf62               | 1.4442676  |
| 1562832_at   | down | C3orf65               | -1.3066753 |
| 1554192_s_at | up   | C4orf23               | 1.2053691  |
| 1552660_a_at | up   | C5orf22               | 1.7116319  |
| 229443_at    | up   | C6orf125              | 1.2189027  |
| 213875_x_at  | up   | C6orf62               | 1.6402713  |
| 224988_at    | up   | C6orf89               | 1.2278509  |
| 1564658_at   | down | C7orf52               | -1.2618679 |
| 219455_at    | up   | C7orf63               | 1.2178006  |
| 241781_at    | up   | C9orf41               | 1.4025706  |
| 224311_s_at  | up   | CAB39                 | 1.6028811  |
| 210691_s_at  | down | CACYBP                | -1.2209071 |
| 215259_s_at  | up   | CADM4                 | 1.2313446  |
| 243084_at    | down | CALD1                 | -1.220924  |
| 214845_s_at  | up   | CALU                  | 1.3490969  |
| 1552768_at   | up   | CAMKK1                | 1.2035276  |
| 208853_s_at  | up   | CANX                  | 1.2782067  |
| 202966_at    | down | CAPN6                 | -1.228815  |
| 200722_s_at  | up   | CAPRIN1               | 1.261952   |
| 212512_s_at  | down | CARM1                 | -1.2410667 |
| 240983_s_at  | up   | CARS                  | 1.2952435  |
| 207620_s_at  | up   | CASK                  | 1.2381201  |
| 211140_s_at  | up   | CASP2                 | 1.2327163  |
| 207686_s_at  | up   | CASP8                 | 1.274467   |
| 211922_s_at  | up   | CAT                   | 1.2101026  |
| 226085_at    | down | CBX5                  | -1.3132952 |
| 226539_s_at  | up   | CCDC42B               | 1.513871   |
| 223815_at    | up   | CCDC45                | 1.2056692  |
| 231657_s_at  | up   | CCDC74B               | 1.2446398  |
| 203119_at    | down | CCDC86                | -1.5212156 |
| 219387_at    | up   | CCDC88A               | 1.4102992  |
| 205392_s_at  | up   | CCL14 /// CCL14-CCL15 | 1.2726742  |
| 213226_at    | down | CCNA2                 | -1.2112991 |
| 214710_s_at  | down | CCNB1                 | -1.2857515 |
| 211814_s_at  | up   | CCNE2                 | 1.4793905  |
| 206337_at    | up   | CCR7                  | 1.2161129  |
| 220351_at    | down | CCRL1                 | -1.3955326 |
| 220671_at    | up   | CCRN4L                | 1.2673248  |

|              |      |          |            |
|--------------|------|----------|------------|
| 210436_at    | up   | CCT8     | 1.3461922  |
| 208653_s_at  | up   | CD164    | 1.274331   |
| 209582_s_at  | up   | CD200    | 1.3509473  |
| 205264_at    | down | CD3EAP   | -1.2416427 |
| 205153_s_at  | up   | CD40     | 1.2441132  |
| 207549_x_at  | up   | CD46     | 1.5851563  |
| 1555746_at   | down | CD79B    | -1.3073603 |
| 204440_at    | up   | CD83     | 1.2129368  |
| 211192_s_at  | up   | CD84     | 1.6923444  |
| 202870_s_at  | down | CDC20    | -1.2372586 |
| 205167_s_at  | down | CDC25C   | -1.2311934 |
| 235787_at    | down | CDC37L1  | -1.235508  |
| 203377_s_at  | up   | CDC40    | 1.2268724  |
| 209287_s_at  | up   | CDC42EP3 | 1.2792972  |
| 218063_s_at  | up   | CDC42EP4 | 1.2054125  |
| 223674_s_at  | up   | CDC42SE1 | 1.4024023  |
| 209055_s_at  | up   | CDC5L    | 1.2400482  |
| 218399_s_at  | down | CDCA4    | -1.2088729 |
| 201130_s_at  | up   | CDH1     | 1.2587872  |
| 207172_s_at  | down | CDH11    | -1.204747  |
| 231534_at    | up   | CDK1     | 1.3227781  |
| 207319_s_at  | up   | CDK13    | 1.516393   |
| 206474_at    | up   | CDK17    | 1.2785498  |
| 211804_s_at  | up   | CDK2     | 1.3398486  |
| 207188_at    | up   | CDK3     | 1.2244807  |
| 207143_at    | up   | CDK6     | 1.2442181  |
| 1553112_s_at | up   | CDK8     | 1.2156193  |
| 236023_at    | up   | CDK9     | 1.2284026  |
| 209714_s_at  | down | CDKN3    | -1.2462797 |
| 213548_s_at  | up   | CDV3     | 1.6756972  |
| 204113_at    | up   | CELF1    | 1.3241057  |
| 210821_x_at  | down | CENPA    | -1.2390207 |
| 205046_at    | down | CENPE    | -1.2900797 |
| 220885_s_at  | up   | CENPJ    | 1.3188705  |
| 228559_at    | down | CENPN    | -1.2548182 |
| 1554606_at   | up   | CEP120   | 1.3448977  |
| 221683_s_at  | up   | CEP290   | 1.2106994  |
| 213957_s_at  | up   | CEP350   | 1.2438337  |
| 238154_at    | down | CEP70    | -1.2000693 |
| 207645_s_at  | up   | CHD1L    | 1.3562883  |
| 1555463_a_at | up   | CHD6     | 1.2927212  |
| 220630_s_at  | up   | CHIA     | 1.2619979  |
| 211358_s_at  | down | CIZ1     | -1.2203966 |
| 229610_at    | up   | CKAP2L   | 1.2619487  |
| 206164_at    | down | CLCA2    | -1.3078173 |
| 205149_s_at  | up   | CLCN4    | 1.3501853  |
| 232128_s_at  | down | CLCN5    | -1.2090104 |
| 221328_at    | up   | CLDN17   | 1.3624657  |
| 201559_s_at  | up   | CLIC4    | 1.2409272  |
| 201768_s_at  | up   | CLINT1   | 1.2812784  |
| 1558924_s_at | up   | CLIP1    | 1.6365954  |
| 211136_s_at  | up   | CLPTM1   | 1.2145925  |
| 229777_at    | down | CLRN3    | -1.2053759 |
| 1553120_at   | up   | CLSPN    | 1.2195165  |
| 205518_s_at  | down | CMAH     | -1.2105225 |
| 224991_at    | down | CMIP     | -1.2962687 |
| 224998_at    | down | CMTM4    | -1.2570964 |
| 203239_s_at  | down | CNOT3    | -1.2588922 |
| 223465_at    | up   | COL4A3BP | 1.4276825  |
| 229600_s_at  | down | CPD      | -1.2248484 |
| 224828_at    | up   | CPEB4    | 1.6389138  |

|              |      |                  |            |
|--------------|------|------------------|------------|
| 241706_at    | down | CPNE8            | -1.2941418 |
| 206184_at    | up   | CRKL             | 1.2209756  |
| 1554464_a_at | up   | CRTAP            | 1.2234758  |
| 207531_at    | down | CRYGC            | -1.27568   |
| 1568620_at   | up   | CSAD             | 1.2058828  |
| 1570169_at   | up   | CSMD2            | 1.2031901  |
| 240228_at    | up   | CSMD3            | 1.2381549  |
| 208867_s_at  | up   | CSNK1A1          | 1.2152762  |
| 222015_at    | up   | CSNK1E           | 1.2865859  |
| 212075_s_at  | up   | CSNK2A1          | 1.2449902  |
| 1555106_a_at | up   | CTDSPL2          | 1.2179205  |
| 202213_s_at  | up   | CUL4B            | 1.2547195  |
| 220724_at    | down | CWH43            | -1.2131425 |
| 212977_at    | up   | CXCR7            | 1.3204342  |
| 235442_at    | up   | CXorf56          | 1.4556006  |
| 1431_at      | up   | CYP2E1           | 1.2867599  |
| 207786_at    | up   | CYP2R1           | 1.2100302  |
| 216607_s_at  | up   | CYP51A1          | 1.3477283  |
| 202879_s_at  | up   | CYTH1            | 1.2249681  |
| 1554335_at   | up   | CYTH4            | 1.2090207  |
| 219837_s_at  | up   | CYTL1            | 1.2000073  |
| 203890_s_at  | up   | DAPK3            | 1.7849464  |
| 236707_at    | up   | DAPP1            | 1.2138002  |
| 205369_x_at  | up   | DBT              | 1.2331996  |
| 216389_s_at  | up   | DCAF11           | 1.3267969  |
| 221851_at    | down | DCAF15           | -1.2154462 |
| 239187_at    | up   | DCAF16           | 1.2104834  |
| 231921_at    | down | DCAF17           | -1.2542593 |
| 1554558_at   | down | DCAF5            | -1.2519573 |
| 221224_s_at  | up   | DCAKD            | 1.2103885  |
| 235258_at    | down | DCP2             | -1.2283409 |
| 205338_s_at  | down | DCT              | -1.2673953 |
| 208675_s_at  | up   | DDOST            | 1.3880887  |
| 210749_x_at  | up   | DDR1             | 1.2399544  |
| 213998_s_at  | up   | DDX17            | 1.4270669  |
| 212514_x_at  | up   | DDX3X            | 1.4152759  |
| 1559954_s_at | up   | DDX42            | 1.5512836  |
| 234347_s_at  | up   | DENR             | 1.260583   |
| 226980_at    | down | DEPDC1B          | -1.2741364 |
| 203695_s_at  | up   | DFNA5            | 1.239448   |
| 202099_s_at  | up   | DGCR2            | 1.2059903  |
| 1566038_at   | up   | DGCR7            | 1.2371081  |
| 234728_s_at  | up   | DHX35            | 1.4181397  |
| 216870_x_at  | down | DLEU2            | -1.2148956 |
| 215629_s_at  | down | DLEU2 /// DLEU2L | -1.2359343 |
| 1561617_at   | down | DNAH6            | -1.2059814 |
| 203810_at    | down | DNAJB4           | -1.2782338 |
| 1555360_a_at | up   | DNAJC11          | 1.2229487  |
| 1554451_s_at | up   | DNAJC14          | 1.203102   |
| 223505_s_at  | up   | DNAJC27          | 1.2841597  |
| 232240_at    | up   | DNHD1            | 1.2583019  |
| 234942_s_at  | down | DNTTIP1          | -1.2394392 |
| 222004_s_at  | up   | DOCK6            | 1.2252464  |
| 239027_at    | up   | DOCK8            | 1.3660889  |
| 219452_at    | up   | DPEP2            | 1.2691046  |
| 226721_at    | down | DPY19L4          | -1.2199434 |
| 1554536_at   | up   | DPYD             | 1.3013089  |
| 205493_s_at  | up   | DPYSL4           | 1.2052408  |
| 203258_at    | down | DRAP1            | -1.2713146 |
| 204455_at    | down | DST              | -1.2563896 |
| 230402_at    | down | DUSP15           | -1.2101262 |



|              |      |                   |            |
|--------------|------|-------------------|------------|
| 204794_at    | up   | DUSP2             | 1.2044349  |
| 226440_at    | up   | DUSP22            | 1.3387105  |
| 208892_s_at  | down | DUSP6             | -1.2646854 |
| 229115_at    | up   | DYNC1H1           | 1.308681   |
| 203692_s_at  | up   | E2F3              | 1.2034937  |
| 233850_s_at  | down | EBF4              | -1.2579534 |
| 219424_at    | up   | EBI3              | 1.2312487  |
| 230659_at    | down | EDEM1             | -1.2852004 |
| 219833_s_at  | down | EFHC1             | -1.226724  |
| 227283_at    | down | EFR3B             | -1.2550792 |
| 1565484_x_at | down | EGFR              | -1.2807788 |
| 222314_x_at  | down | EGOT              | -1.2756013 |
| 205249_at    | up   | EGR2              | 1.2305626  |
| 209037_s_at  | up   | EHD1              | 1.2235167  |
| 222576_s_at  | up   | EIF2C1            | 1.6433426  |
| 205321_at    | up   | EIF2S3            | 1.2300643  |
| 1555996_s_at | up   | EIF4A2            | 1.5830824  |
| 211937_at    | up   | EIF4B             | 1.254732   |
| 1554310_a_at | up   | EIF4G3            | 1.2433524  |
| 220363_s_at  | up   | ELMO2             | 1.235109   |
| 204398_s_at  | up   | EML2              | 1.5175923  |
| 220386_s_at  | up   | EML4              | 1.2657421  |
| 237691_x_at  | up   | ENO3              | 1.2202686  |
| 204142_at    | down | ENOSF1            | -1.202513  |
| 205066_s_at  | up   | ENPP1             | 1.2224588  |
| 220153_at    | up   | ENTPD7            | 1.2953317  |
| 217254_s_at  | down | EPO               | -1.2142091 |
| 209962_at    | down | EPOR              | -1.3258492 |
| 200841_s_at  | up   | EPRS              | 1.5490665  |
| 210385_s_at  | up   | ERAP1             | 1.301499   |
| 217611_at    | up   | ERICH1            | 1.2212138  |
| 202444_s_at  | up   | ERLIN1            | 1.6385611  |
| 1555830_s_at | up   | ESYT2             | 1.265215   |
| 226432_at    | up   | ETNK1             | 1.2364532  |
| 211825_s_at  | up   | EWSR1 /// FLI1    | 1.3454281  |
| 218748_s_at  | up   | EXOC5             | 1.5498394  |
| 1553947_at   | up   | EXOSC6            | 1.3065883  |
| 214734_at    | down | EXPH5             | -1.2002375 |
| 214608_s_at  | up   | EYA1              | 1.2200563  |
| 211310_at    | up   | EZH1              | 1.5040091  |
| 208621_s_at  | up   | EZR               | 1.7633995  |
| 207810_at    | down | F13B              | -1.2223849 |
| 222511_x_at  | up   | FAF1              | 1.8919816  |
| 212106_at    | up   | FAF2              | 1.2984308  |
| 1557128_at   | up   | FAM111B           | 1.2446389  |
| 1555947_at   | down | FAM120A           | -1.4169422 |
| 1552882_a_at | down | FAM123B           | -1.2533257 |
| 230519_at    | up   | FAM124A           | 1.2670133  |
| 231874_at    | up   | FAM126B           | 1.3884314  |
| 227828_s_at  | up   | FAM176A           | 1.2805197  |
| 1554132_a_at | up   | FAM190B           | 1.4590812  |
| 232217_at    | down | FAM26E            | -1.2108623 |
| 1554165_at   | down | FAM53B            | -1.2080717 |
| 235030_at    | up   | FAM55C            | 1.3563026  |
| 1559950_at   | down | FAM66C /// FAM66D | -1.4033489 |
| 216897_s_at  | up   | FAM76A            | 1.3062598  |
| 1553749_at   | down | FAM76B            | -1.2745601 |
| 241481_at    | down | FAM81A            | -1.2045404 |
| 238741_at    | down | FAM83A            | -1.2098011 |
| 1557217_a_at | up   | FANCB             | 1.2661111  |
| 1554277_s_at | up   | FANCM             | 1.3058311  |

|              |      |                   |            |
|--------------|------|-------------------|------------|
| 215068_s_at  | down | FBXL18            | -1.33131   |
| 1553500_at   | down | FBXL21            | -1.2053086 |
| 226970_at    | down | FBXO33            | -1.3342328 |
| 1559094_at   | up   | FBXO9             | 1.2685993  |
| 209456_s_at  | up   | FBXW11            | 1.4762064  |
| 218831_s_at  | up   | FCGRT             | 1.2031544  |
| 1553196_a_at | up   | FCRL3             | 1.3161232  |
| 229989_at    | up   | FDXACB1           | 1.2486943  |
| 222245_s_at  | up   | FER1L4            | 1.2021043  |
| 210973_s_at  | up   | FGFR1             | 1.2479326  |
| 223263_s_at  | up   | FGFR1OP2          | 1.2579206  |
| 219718_at    | up   | FGGY              | 1.2104558  |
| 226769_at    | up   | FIBIN             | 1.2131882  |
| 76897_s_at   | up   | FKBP15            | 1.5776329  |
| 204560_at    | up   | FKBP5             | 1.4996216  |
| 224288_x_at  | up   | FKSG49            | 1.3765793  |
| 227302_s_at  | up   | FLII /// LLGL1    | 1.201744   |
| 205511_at    | up   | FLJ10038          | 1.4245838  |
| 224073_at    | up   | FLJ20464          | 1.2149084  |
| 1553145_at   | up   | FLJ39653          | 1.4630386  |
| 1557372_at   | up   | FLJ41757          | 1.2652222  |
| 211299_s_at  | up   | FLOT2             | 1.2812767  |
| 219316_s_at  | up   | FLVCR2            | 1.2433511  |
| 232249_at    | up   | FMNL3             | 1.3272188  |
| 235101_at    | up   | FNBP4             | 1.2754292  |
| 242029_at    | up   | FNDC3B            | 1.3083805  |
| 1555247_a_at | up   | FNIP1 /// RAPGEF6 | 1.2547759  |
| 228463_at    | down | FOXA3             | -1.2123741 |
| 208006_at    | up   | FOXI1             | 1.208199   |
| 217310_s_at  | up   | FOXJ3             | 1.3377043  |
| 218031_s_at  | up   | FOXN3             | 1.2644747  |
| 210655_s_at  | up   | FOXO3 /// FOXO3B  | 1.3594829  |
| 1563687_a_at | up   | FRYL              | 1.2577755  |
| 223985_at    | up   | FSD1L             | 1.2842823  |
| 223120_at    | up   | FUCA2             | 1.2420087  |
| 204452_s_at  | up   | FZD1              | 1.2272542  |
| 210220_at    | up   | FZD2              | 1.2654998  |
| 223254_s_at  | up   | G2E3              | 1.2814575  |
| 242422_at    | up   | G3BP1             | 1.6025373  |
| 214987_at    | up   | GAB1              | 1.2537209  |
| 203146_s_at  | up   | GABBR1            | 1.2307272  |
| 211679_x_at  | up   | GABBR2            | 1.2047298  |
| 232708_at    | up   | GALT              | 1.2353748  |
| 217445_s_at  | up   | GART              | 1.4258344  |
| 205848_at    | up   | GAS2              | 1.2561656  |
| 207704_s_at  | up   | GAS7              | 1.212802   |
| 214711_at    | up   | GATC              | 1.2177708  |
| 1555125_at   | up   | GCFC1             | 1.4320351  |
| 221279_at    | up   | GDAP1             | 1.450111   |
| 229868_s_at  | down | GDF15             | -1.287701  |
| 221576_at    | up   | GDF15             | 1.2748805  |
| 1555606_a_at | down | GDPD1             | -1.200385  |
| 231918_s_at  | up   | GFM2              | 1.2053763  |
| 1554670_at   | up   | GGA1              | 1.3941542  |
| 214190_x_at  | up   | GGA2              | 1.3312801  |
| 236583_at    | down | GIMAP1            | -1.2174828 |
| 1553058_at   | up   | GIPC3             | 1.241221   |
| 207387_s_at  | up   | GK                | 1.2935873  |
| 215966_x_at  | up   | GK3P              | 1.2335669  |
| 219933_at    | down | GLRX2             | -1.2033429 |
| 223079_s_at  | up   | GLS               | 1.2266082  |

|              |      |           |            |
|--------------|------|-----------|------------|
| 215794_x_at  | up   | GLUD2     | 1.309881   |
| 1554712_a_at | down | GLYATL2   | -1.2565421 |
| 222115_x_at  | up   | GLYR1     | 1.2689847  |
| 200744_s_at  | up   | GNB1      | 1.2560008  |
| 46947_at     | up   | GNL3L     | 1.2525293  |
| 211522_s_at  | down | GNRHR     | -1.2125251 |
| 208797_s_at  | up   | GOLGA8A   | 1.4147563  |
| 204324_s_at  | up   | GOLIM4    | 1.3684632  |
| 239159_at    | up   | GOSR2     | 1.2846826  |
| 212487_at    | up   | GPATCH8   | 1.2186728  |
| 202756_s_at  | up   | GPC1      | 1.2246386  |
| 232195_at    | down | GPR158    | -1.2056496 |
| 244617_at    | down | GPR26     | -1.3236516 |
| 228313_at    | down | GPRC5B    | -1.2442926 |
| 206620_at    | up   | GRAP      | 1.2719648  |
| 233171_at    | down | GRIN3A    | -1.2056001 |
| 215766_at    | up   | GSTA1     | 1.3533078  |
| 238585_at    | up   | GTDC1     | 1.2703116  |
| 210620_s_at  | up   | GTF3C2    | 1.2934701  |
| 204318_s_at  | down | GTSE1     | -1.318172  |
| 1555568_at   | up   | GUSBL1    | 1.4084787  |
| 221892_at    | up   | H6PD      | 1.230185   |
| 209819_at    | down | HABP4     | -1.2562569 |
| 218602_s_at  | down | HAUS6     | -1.2056735 |
| 240602_at    | up   | HBS1L     | 1.2289792  |
| 1554478_a_at | up   | HEATR3    | 1.204536   |
| 1557100_s_at | up   | HECTD1    | 1.4062873  |
| 219319_at    | down | HIF3A     | -1.206478  |
| 226537_at    | up   | HINT3     | 1.2206274  |
| 205425_at    | up   | HIP1      | 1.3270811  |
| 217427_s_at  | up   | HIRA      | 1.4724717  |
| 207982_at    | up   | HIST1H1T  | 1.2245693  |
| 215071_s_at  | up   | HIST1H2AC | 1.2059689  |
| 214516_at    | down | HIST1H4B  | -1.2549939 |
| 1560485_at   | up   | HIVEP1    | 1.2035419  |
| 221978_at    | up   | HLA-F     | 1.2324376  |
| 205822_s_at  | up   | HMGCS1    | 1.7307211  |
| 201055_s_at  | up   | HNRNPA0   | 1.2105442  |
| 213470_s_at  | up   | HNRNPH1   | 1.3795176  |
| 209675_s_at  | down | HNRNPUL1  | -1.2262769 |
| 219976_at    | down | HOOK1     | -1.2269777 |
| 213150_at    | up   | HOXA10    | 1.2043763  |
| 231121_at    | down | HPS3      | -1.239754  |
| 231705_at    | up   | HRSP12    | 1.3997586  |
| 211220_s_at  | up   | HSF2      | 1.2357876  |
| 1557910_at   | up   | HSP90AB1  | 1.560843   |
| 216450_x_at  | up   | HSP90B1   | 1.2380035  |
| 211016_x_at  | up   | HSPA4     | 1.5372337  |
| 215485_s_at  | up   | ICAM1     | 1.2222471  |
| 1552837_at   | down | ICK       | -1.2683991 |
| 209293_x_at  | up   | ID4       | 1.2500161  |
| 208965_s_at  | up   | IFI16     | 1.2847668  |
| 1555464_at   | up   | IFIH1     | 1.555285   |
| 216494_at    | up   | IGF2BP3   | 1.2441297  |
| 213674_x_at  | up   | IGHD      | 1.209107   |
| 216901_s_at  | up   | IKZF1     | 1.6100539  |
| 221092_at    | up   | IKZF3     | 1.9275341  |
| 207433_at    | up   | IL10      | 1.2236744  |
| 204773_at    | up   | IL11RA    | 1.2118208  |
| 228685_at    | down | IL17RA    | -1.2246972 |
| 224283_x_at  | down | IL18BP    | -1.2907579 |

|              |      |                   |            |
|--------------|------|-------------------|------------|
| 208200_at    | down | IL1A              | -1.3095239 |
| 204863_s_at  | up   | IL6ST             | 1.2395563  |
| 208930_s_at  | up   | ILF3              | 1.3399829  |
| 219769_at    | up   | INCENP            | 1.479723   |
| 213544_at    | down | ING2              | -1.3011824 |
| 242293_at    | up   | ING3              | 1.2958503  |
| 243070_at    | up   | INO80D            | 1.3911563  |
| 208364_at    | up   | INPP4A            | 1.2509352  |
| 1554757_a_at | up   | INPP5A            | 1.2216833  |
| 213643_s_at  | up   | INPP5B            | 1.2094048  |
| 201625_s_at  | up   | INSIG1            | 1.2569327  |
| 229633_at    | down | INTS10            | -1.2230217 |
| 228946_at    | down | INTU              | -1.2113076 |
| 215130_s_at  | up   | IQCK              | 1.2329689  |
| 238725_at    | up   | IRF1              | 1.2011575  |
| 224571_at    | up   | IRF2BP2           | 1.2547354  |
| 235182_at    | down | ISM1              | -1.2516865 |
| 209743_s_at  | up   | ITCH              | 1.2091734  |
| 1553530_a_at | up   | ITGB1             | 1.2460012  |
| 1555349_a_at | up   | ITGB2             | 1.3044101  |
| 204627_s_at  | up   | ITGB3             | 1.2276034  |
| 210888_s_at  | up   | ITIH1             | 1.2024969  |
| 213076_at    | down | ITPKC             | -1.2585015 |
| 206245_s_at  | up   | IVNS1ABP          | 1.2640836  |
| 224775_at    | up   | IWS1              | 1.2025434  |
| 215734_at    | up   | IZUMO4            | 1.6827525  |
| 1552610_a_at | up   | JAK1              | 1.4068354  |
| 215138_s_at  | up   | KAZ               | 1.2018071  |
| 223765_s_at  | up   | KBTBD4            | 1.4288325  |
| 203204_s_at  | up   | KDM4A             | 1.2872592  |
| 235789_at    | up   | KDM4B             | 1.4039657  |
| 238220_at    | up   | KDM6A             | 1.2444586  |
| 220513_at    | down | KHDC1L            | -1.2078569 |
| 227555_s_at  | up   | KHSRP             | 1.3050393  |
| 201728_s_at  | up   | KIAA0100          | 1.4800811  |
| 210593_at    | down | KIAA0913 /// SAT1 | -1.3425449 |
| 228476_at    | up   | KIAA1407          | 1.2262238  |
| 223799_at    | up   | KIAA1826          | 1.5668621  |
| 232837_at    | down | KIF13A            | -1.2013    |
| 206364_at    | down | KIF14             | -1.3524646 |
| 218755_at    | down | KIF20A            | -1.2435501 |
| 201992_s_at  | up   | KIF5B             | 1.2963724  |
| 230701_x_at  | down | KIF9              | -1.2416157 |
| 211389_x_at  | up   | KIR3DS1           | 1.2067277  |
| 220825_s_at  | down | KIRREL            | -1.2244738 |
| 225596_at    | up   | KLC4              | 1.2337744  |
| 208960_s_at  | up   | KLF6              | 1.2428515  |
| 221986_s_at  | up   | KLHL24            | 1.6163739  |
| 1553027_a_at | up   | KLHL4             | 1.2109339  |
| 1560397_s_at | up   | KLHL6             | 1.5756903  |
| 216821_at    | down | KRT8              | -1.2562897 |
| 233681_at    | down | KRTAP3-3          | -1.2516819 |
| 224459_at    | down | L2HGDH            | -1.2553123 |
| 210644_s_at  | up   | LAIR1             | 1.4919143  |
| 219407_s_at  | up   | LAMC3             | 1.2146852  |
| 201551_s_at  | up   | LAMP1             | 1.416961   |
| 212193_s_at  | down | LARP1             | -1.2601091 |
| 233764_s_at  | up   | LARP1B            | 1.2555962  |
| 1555384_a_at | up   | LARP4             | 1.2864332  |
| 1555643_s_at | up   | LILRA5            | 1.2753243  |
| 201847_at    | up   | LIPA              | 1.2180349  |

|              |      |                                   |            |
|--------------|------|-----------------------------------|------------|
| 203293_s_at  | up   | LMAN1                             | 1.4436345  |
| 239057_at    | down | LMOD2                             | -1.2352587 |
| 1560950_at   | up   | LOC100127950                      | 1.2152765  |
| 224362_at    | down | LOC100128922                      | -1.2007619 |
| 227318_at    | up   | LOC100131199                      | 1.2275884  |
| 230799_at    | up   | LOC100134259                      | 1.21235    |
| 231989_s_at  | up   | LOC100271836 /// LOC641298        | 1.4766943  |
| 215434_x_at  | up   | LOC100288142 /// NBPF1 /// NBPF10 | 1.4783069  |
| 226125_at    | up   | LOC100288152                      | 1.2525893  |
| 223745_at    | down | LOC100288525                      | -1.2110035 |
| 234344_at    | down | LOC100288675                      | -1.366026  |
| 228207_at    | down | LOC100499489                      | -1.3135792 |
| 217690_at    | up   | LOC100505523                      | 1.2417207  |
| 231924_at    | down | LOC100506305                      | -1.4148275 |
| 240917_at    | up   | LOC100506430                      | 1.2669165  |
| 221109_at    | up   | LOC100506571                      | 1.3075271  |
| 244600_at    | up   | LOC100506589                      | 1.3543168  |
| 231559_at    | down | LOC100506941                      | -1.2216151 |
| 243699_at    | up   | LOC100507006                      | 1.279482   |
| 214316_x_at  | down | LOC100507328 /// LOC100508591     | -1.2219332 |
| 1555852_at   | down | LOC100507463                      | -1.2310925 |
| 211973_at    | up   | LOC100507620                      | 1.5277437  |
| 241521_at    | up   | LOC100507652                      | 1.2427148  |
| 231501_at    | down | LOC100508410                      | -1.2346087 |
| 213650_at    | up   | LOC100509749                      | 1.3383579  |
| 1564287_at   | down | LOC144776                         | -1.2229095 |
| 228779_at    | down | LOC146880                         | -1.235323  |
| 1561059_a_at | down | LOC152024                         | -1.2213635 |
| 1564651_at   | down | LOC221710                         | -1.2276598 |
| 216608_at    | down | LOC26102                          | -1.2349784 |
| 230245_s_at  | up   | LOC283663                         | 1.2801871  |
| 1556709_a_at | up   | LOC283887                         | 1.2242954  |
| 236854_at    | up   | LOC284749                         | 1.2567853  |
| 1557267_s_at | up   | LOC284952                         | 1.411843   |
| 1562388_at   | up   | LOC285819                         | 1.2171081  |
| 232663_s_at  | up   | LOC390595                         | 1.260086   |
| 1569213_at   | down | LOC400891                         | -1.2745079 |
| 227969_at    | up   | LOC400960                         | 1.2160639  |
| 1569783_at   | down | LOC401387                         | -1.2520658 |
| 240151_at    | up   | LOC404266                         | 1.3112242  |
| 232001_at    | down | LOC439949                         | -1.220347  |
| 215090_x_at  | up   | LOC440434                         | 1.2332795  |
| 242222_at    | up   | LOC440894                         | 1.2549862  |
| 1555860_x_at | up   | LOC440944                         | 1.3138562  |
| 235416_at    | up   | LOC643201                         | 1.2415385  |
| 1558028_x_at | up   | LOC647979                         | 1.3630985  |
| 240436_at    | down | LOC650794                         | -1.2401552 |
| 1570140_at   | up   | LOC653110                         | 1.2342651  |
| 231987_at    | up   | LOC728264                         | 1.2277015  |
| 1562257_x_at | down | LOC728392 /// NLRP1               | -1.225269  |
| 229678_at    | up   | LOC728431                         | 1.220079   |
| 228016_s_at  | down | LOC729580                         | -1.2933202 |
| 1555058_a_at | up   | LPGAT1                            | 1.4418092  |
| 212272_at    | up   | LPIN1                             | 1.2224839  |
| 1559580_at   | down | LRRC39                            | -1.2333808 |
| 242112_at    | up   | LSM11                             | 1.3246778  |
| 219653_at    | up   | LSM14B                            | 1.7204089  |
| 209449_at    | down | LSM2                              | -1.2162198 |
| 211019_s_at  | up   | LSS                               | 1.4111693  |
| 1558173_a_at | up   | LUZP1                             | 1.2427858  |
| 210754_s_at  | up   | LYN                               | 1.2250478  |

|              |      |                   |            |
|--------------|------|-------------------|------------|
| 215222_x_at  | up   | MACF1             | 1.2028706  |
| 1552913_at   | down | MAGEB18           | -1.2360934 |
| 1555262_a_at | down | MAGI1             | -1.2012762 |
| 224568_x_at  | up   | MALAT1            | 2.579687   |
| 208116_s_at  | up   | MAN1A1            | 1.4797127  |
| 215391_at    | down | MAP1A             | -1.2572525 |
| 213490_s_at  | up   | MAP2K2            | 1.2135351  |
| 214786_at    | up   | MAP3K1            | 1.2863754  |
| 205447_s_at  | up   | MAP3K12           | 1.2999891  |
| 221695_s_at  | up   | MAP3K2            | 1.487269   |
| 200835_s_at  | up   | MAP4              | 1.557063   |
| 204936_at    | down | MAP4K2            | -1.2586355 |
| 208351_s_at  | up   | MAPK1             | 1.2162853  |
| 237413_at    | down | MAPK10            | -1.2712121 |
| 210477_x_at  | up   | MAPK8             | 1.2603906  |
| 200712_s_at  | up   | MAPRE1            | 1.2076565  |
| 203841_x_at  | up   | MAPRE3            | 1.2011666  |
| 235385_at    | up   | MARCH1            | 1.267593   |
| 201737_s_at  | down | MARCH6            | -1.2144692 |
| 1558093_s_at | up   | MATR3             | 1.5457156  |
| 1555611_s_at | up   | MBD1              | 1.3159605  |
| 230298_at    | down | MBLAC2            | -1.2104106 |
| 1555594_a_at | up   | MBNL1             | 1.2800454  |
| 210136_at    | up   | MBP               | 1.2946824  |
| 233231_at    | up   | MCCC2             | 1.2708365  |
| 1559309_at   | up   | MCFD2             | 1.4515995  |
| 223855_s_at  | down | MCHR1             | -1.2607422 |
| 215581_s_at  | up   | MCM3AP            | 1.3901755  |
| 232740_at    | up   | MCM3AP-AS         | 1.2018572  |
| 1555465_at   | up   | MCOLN2            | 1.2332513  |
| 217373_x_at  | up   | MDM2              | 1.2619742  |
| 242911_at    | up   | MED13L            | 1.4040172  |
| 219730_at    | up   | MED18             | 2.6807134  |
| 222438_at    | down | MED4              | -1.2093773 |
| 207968_s_at  | up   | MEF2C             | 1.7839372  |
| 238931_at    | up   | METT10D           | 1.2467695  |
| 1553688_at   | up   | METTL6            | 1.2007518  |
| 226346_at    | down | MEX3A             | -1.3013119 |
| 222567_s_at  | up   | MEX3C             | 1.6622223  |
| 231283_at    | up   | MGAT4A            | 1.2105018  |
| 1554305_at   | up   | MGC20647          | 1.2635732  |
| 221286_s_at  | down | MGC29506          | -1.2068632 |
| 200898_s_at  | up   | MGEA5             | 1.2410163  |
| 1569057_s_at | up   | MIA3              | 1.2557929  |
| 205905_s_at  | up   | MICA /// MICB     | 1.2105322  |
| 209733_at    | down | MID2              | -1.2316021 |
| 212079_s_at  | up   | MLL               | 1.603879   |
| 217069_at    | down | MLL4              | -1.2281549 |
| 242082_at    | up   | MMAB              | 1.2325639  |
| 207118_s_at  | up   | MMP23A /// MMP23B | 1.3434197  |
| 236749_at    | up   | MNT               | 1.2030722  |
| 201299_s_at  | up   | MOBK1B            | 1.381707   |
| 218212_s_at  | down | MOCS2             | -1.2205924 |
| 206141_at    | up   | MOCS3             | 1.2339277  |
| 243683_at    | up   | MORF4L2           | 1.5049694  |
| 237158_s_at  | up   | MPHOSPH9          | 1.2062144  |
| 224173_s_at  | up   | MRPL30            | 1.6255686  |
| 213840_s_at  | up   | MRPS12            | 1.2399265  |
| 243821_at    | up   | MRPS31            | 1.375165   |
| 217418_x_at  | up   | MS4A1             | 1.2066582  |
| 224355_s_at  | up   | MS4A8B            | 1.2265275  |

|              |      |            |            |
|--------------|------|------------|------------|
| 224407_s_at  | up   | MST4       | 1.3950046  |
| 206800_at    | up   | MTHFR      | 1.2002832  |
| 226956_at    | up   | MTMR3      | 1.253336   |
| 244718_at    | up   | MTMR9L     | 1.3540175  |
| 218687_s_at  | down | MUC13      | -1.2597097 |
| 213432_at    | up   | MUC5B      | 1.2105894  |
| 1555448_at   | up   | MUDENG     | 1.4037958  |
| 215649_s_at  | up   | MVK        | 1.4291915  |
| 213906_at    | down | MYBL1      | -1.2098194 |
| 216188_at    | down | MYCNOS     | -1.2263637 |
| 229718_at    | down | N4BP2L1    | -1.2112918 |
| 220311_at    | down | N6AMT1     | -1.2459083 |
| 227651_at    | down | NACC1      | -1.2641237 |
| 244828_x_at  | down | NAF1       | -1.2337818 |
| 1555167_s_at | up   | NAMPT      | 1.2202979  |
| 236188_s_at  | down | NAP1L4     | -1.2277783 |
| 235189_at    | up   | NARG2      | 1.2769282  |
| 214693_x_at  | up   | NBPF10     | 1.6959252  |
| 211685_s_at  | up   | NCALD      | 1.2398589  |
| 218662_s_at  | down | NCAPG      | -1.2104121 |
| 209734_at    | up   | NCKAP1L    | 1.3184203  |
| 221075_s_at  | up   | NCR2       | 1.3003516  |
| 232885_at    | up   | NCRNA00081 | 1.2070838  |
| 232093_at    | up   | NCRNA00085 | 1.2390313  |
| 222625_s_at  | up   | NDE1       | 1.2007399  |
| 217800_s_at  | down | NDFIP1     | -1.2383313 |
| 221082_s_at  | up   | NDRG3      | 1.3101386  |
| 1554010_at   | down | NDST1      | -1.2283449 |
| 235321_at    | up   | NDUFS1     | 1.5063697  |
| 214657_s_at  | up   | NEAT1      | 2.154953   |
| 221801_x_at  | down | NEFL       | -1.2041172 |
| 219396_s_at  | up   | NEIL1      | 1.4536289  |
| 213328_at    | up   | NEK1       | 1.2443074  |
| 214738_s_at  | up   | NEK9       | 1.3404329  |
| 213673_x_at  | up   | NENF       | 1.2067016  |
| 211094_s_at  | up   | NF1        | 1.3574911  |
| 238618_at    | up   | NF2        | 1.2066199  |
| 212808_at    | up   | NFATC2IP   | 1.2263535  |
| 207535_s_at  | up   | NFKB2      | 1.3780929  |
| 241889_at    | up   | NFKBID     | 1.2587924  |
| 207492_at    | up   | NGLY1      | 1.2905523  |
| 239314_at    | up   | NHLRC3     | 1.2315524  |
| 242352_at    | up   | NIPBL      | 1.5535007  |
| 230771_at    | up   | NKAIN4     | 1.2107782  |
| 215339_at    | up   | NKTR       | 1.3084674  |
| 1552553_a_at | down | NLRC4      | -1.2205169 |
| 218036_x_at  | up   | NMD3       | 1.2811785  |
| 221566_s_at  | up   | NOL3       | 1.3251705  |
| 1554084_a_at | up   | NOL9       | 1.2240145  |
| 203023_at    | down | NOP16      | -1.2076781 |
| 214101_s_at  | down | NPEPPS     | -1.2739216 |
| 215123_at    | up   | NPIPL3     | 2.2132967  |
| 207203_s_at  | up   | NR1I2      | 1.2121333  |
| 210841_s_at  | up   | NRP2       | 1.2761599  |
| 229649_at    | up   | NRXN3      | 1.9128551  |
| 224582_s_at  | up   | NUCKS1     | 1.3591244  |
| 209230_s_at  | down | NUPR1      | -1.3713002 |
| 209629_s_at  | up   | NXT2       | 2.0730102  |
| 228781_at    | up   | OBFC1      | 1.2584674  |
| 218903_s_at  | down | OBFC2B     | -1.2516003 |
| 1553051_s_at | down | ODF3       | -1.2712837 |

|              |      |          |            |
|--------------|------|----------|------------|
| 1564805_a_at | down | OFCC1    | -1.2007698 |
| 221090_s_at  | down | OGFOD1   | -1.3172287 |
| 226810_at    | down | OGFRL1   | -1.2090895 |
| 236121_at    | down | OR51E2   | -1.2606933 |
| 216536_at    | down | OR7E19P  | -1.2348139 |
| 228801_at    | up   | ORMDL1   | 1.2909124  |
| 235136_at    | up   | ORMDL3   | 1.4246253  |
| 1554414_a_at | up   | OSGIN2   | 1.2542667  |
| 230170_at    | down | OSM      | -1.3815665 |
| 222825_at    | down | OTUD6B   | -1.239291  |
| 205432_at    | up   | OVGP1    | 1.2332786  |
| 214794_at    | down | PA2G4    | -1.2547312 |
| 1554691_a_at | up   | PACSIN2  | 1.2960644  |
| 205564_at    | up   | PAGE4    | 1.2408985  |
| 200907_s_at  | up   | PALLD    | 1.213033   |
| 212720_at    | up   | PAPOLA   | 1.3968303  |
| 219236_at    | up   | PAQR6    | 1.3212606  |
| 214834_at    | up   | PAR5     | 1.5537438  |
| 235234_at    | up   | PATL1    | 1.3634104  |
| 210581_x_at  | up   | PATZ1    | 1.2862538  |
| 224152_s_at  | up   | PBRM1    | 1.2719182  |
| 213263_s_at  | down | PCBP2    | -1.2134027 |
| 203860_at    | down | PCCA     | -1.2217592 |
| 215277_at    | down | PCDH1    | -1.2461945 |
| 232382_s_at  | up   | PCMTD1   | 1.9381138  |
| 204870_s_at  | up   | PCSK2    | 1.2140542  |
| 202730_s_at  | up   | PDCD4    | 1.2305881  |
| 211171_s_at  | up   | PDE10A   | 1.3790535  |
| 224223_s_at  | down | PDE11A   | -1.2103171 |
| 222317_at    | down | PDE3B    | -1.2016855 |
| 224046_s_at  | up   | PDE7A    | 1.5684615  |
| 1552931_a_at | up   | PDE8A    | 1.2675264  |
| 222860_s_at  | up   | PDGFD    | 1.4581184  |
| 221957_at    | up   | PDK3     | 1.340436   |
| 216804_s_at  | up   | PDLIM5   | 1.3626243  |
| 232861_at    | up   | PDP2     | 1.3593     |
| 221244_s_at  | up   | PDPK1    | 1.3142414  |
| 204742_s_at  | down | PDS5B    | -1.2251458 |
| 215481_s_at  | up   | PEX5     | 1.301508   |
| 226733_at    | up   | PFKFB2   | 1.3373339  |
| 231967_at    | down | PHF20L1  | -1.2343544 |
| 1554153_a_at | up   | PHF21A   | 1.225892   |
| 217998_at    | up   | PHLDA1   | 1.2528713  |
| 228874_at    | up   | PHLDB3   | 1.2486728  |
| 215236_s_at  | up   | PICALM   | 1.4521581  |
| 1554508_at   | up   | PIK3AP1  | 1.3864944  |
| 1553694_a_at | up   | PIK3C2A  | 1.4225479  |
| 206369_s_at  | up   | PIK3CG   | 1.3686428  |
| 212249_at    | up   | PIK3R1   | 1.3672674  |
| 1557719_at   | up   | PIKFYVE  | 1.309797   |
| 211205_x_at  | up   | PIP5K1A  | 1.2568467  |
| 232887_at    | up   | PIRT     | 1.2111629  |
| 1568949_at   | up   | PITPNC1  | 1.2801144  |
| 201927_s_at  | up   | PKP4     | 1.2325436  |
| 235110_at    | up   | PLA2G16  | 1.2503577  |
| 222795_s_at  | up   | PLCXD1   | 1.2912709  |
| 219566_at    | up   | PLEKHF1  | 1.2997558  |
| 236255_at    | down | PLEKHG4B | -1.2072021 |
| 204939_s_at  | down | PLN      | -1.2218258 |
| 228104_at    | down | PLXNA4   | -1.224986  |
| 222406_s_at  | up   | PNRC2    | 1.2998168  |



|              |      |          |            |
|--------------|------|----------|------------|
| 1555383_a_at | up   | POF1B    | 1.2651567  |
| 1553587_a_at | down | POLE4    | -1.2411529 |
| 206654_s_at  | up   | POLR3G   | 1.4770805  |
| 228343_at    | down | POU2F2   | -1.2121457 |
| 1553639_a_at | up   | PPARGC1B | 1.203405   |
| 214146_s_at  | down | PPBP     | -1.2790129 |
| 202065_s_at  | up   | PPFIA1   | 1.3694404  |
| 231370_at    | up   | PPM1A    | 1.408786   |
| 244011_at    | up   | PPM1K    | 1.3044407  |
| 228222_at    | down | PPP1CB   | -1.3042175 |
| 201702_s_at  | up   | PPP1R10  | 1.3581536  |
| 1566303_s_at | down | PPP1R11  | -1.2328879 |
| 211169_s_at  | down | PPP1R3A  | -1.2009858 |
| 225124_at    | down | PPP1R9B  | -1.2019509 |
| 202186_x_at  | down | PPP2R5A  | -1.2188685 |
| 211159_s_at  | up   | PPP2R5D  | 1.2175193  |
| 227630_at    | down | PPP2R5E  | -1.2342108 |
| 203529_at    | down | PPP6C    | -1.221561  |
| 235744_at    | up   | PPTC7    | 1.2888694  |
| 210670_at    | up   | PPY      | 1.451745   |
| 203456_at    | up   | PRAF2    | 1.2432952  |
| 207752_x_at  | up   | PRB1     | 1.2460561  |
| 214474_at    | up   | PRKAB2   | 1.4692214  |
| 227824_at    | up   | PRKCB    | 1.5953768  |
| 206270_at    | down | PRKCG    | -1.216325  |
| 241669_x_at  | down | PRKD2    | -1.3429691 |
| 206358_at    | up   | PRM1     | 1.2137188  |
| 220872_at    | up   | PRO2964  | 1.3229202  |
| 214203_s_at  | up   | PRODH    | 1.2663602  |
| 207401_at    | up   | PROX1    | 1.2211896  |
| 208879_x_at  | up   | PRPF6    | 1.2705022  |
| 230352_at    | up   | PRPS2    | 2.011175   |
| 205869_at    | up   | PRSS1    | 1.2168664  |
| 220051_at    | up   | PRSS21   | 1.2055304  |
| 200866_s_at  | up   | PSAP     | 1.2240603  |
| 215923_s_at  | up   | PSD4     | 1.4714817  |
| 207782_s_at  | up   | PSEN1    | 1.2608564  |
| 240091_at    | down | PSMA8    | -1.248967  |
| 212220_at    | up   | PSME4    | 1.3273816  |
| 212016_s_at  | up   | PTBP1    | 1.209326   |
| 1554614_a_at | up   | PTBP2    | 1.4332104  |
| 211909_x_at  | down | PTGER3   | -1.3087537 |
| 204896_s_at  | up   | PTGER4   | 1.3020587  |
| 224950_at    | up   | PTGFRN   | 1.2019918  |
| 241453_at    | up   | PTK2     | 1.2458259  |
| 209465_x_at  | down | PTN      | -1.254488  |
| 200730_s_at  | up   | PTP4A1   | 1.6740797  |
| 209895_at    | up   | PTPN11   | 1.4620327  |
| 229362_at    | up   | PUS10    | 1.2219067  |
| 1558290_a_at | down | PVT1     | -1.3563555 |
| 238046_x_at  | down | PWWP2B   | -1.2656078 |
| 219802_at    | down | PYROXD1  | -1.2127897 |
| 221270_s_at  | up   | QTRT1    | 1.3911604  |
| 208730_x_at  | down | RAB2A    | -1.2052106 |
| 1552846_s_at | down | RAB42    | -1.2129914 |
| 206113_s_at  | up   | RAB5A    | 1.2406734  |
| 201048_x_at  | up   | RAB6A    | 1.3182312  |
| 222846_at    | up   | RAB8B    | 1.3052921  |
| 200607_s_at  | up   | RAD21    | 1.28602    |
| 201222_s_at  | up   | RAD23B   | 1.517674   |
| 236880_at    | down | RAD52    | -1.2401462 |

|              |      |                  |            |
|--------------|------|------------------|------------|
| 202482_x_at  | down | RANBP1           | -1.3199717 |
| 1558773_s_at | up   | RANBP10          | 1.2014457  |
| 201711_x_at  | up   | RANBP2           | 1.4546378  |
| 210120_s_at  | down | RANBP3           | -1.2046494 |
| 229905_at    | up   | RAP1GDS1         | 1.2158082  |
| 214487_s_at  | up   | RAP2A /// RAP2B  | 1.3407     |
| 203096_s_at  | up   | RAPGEF2          | 1.2796888  |
| 204680_s_at  | up   | RAPGEF5          | 1.3172569  |
| 208530_s_at  | up   | RARB             | 1.2765503  |
| 208534_s_at  | up   | RASA4 /// RASA4P | 1.2383194  |
| 1554999_at   | up   | RASGEF1B         | 1.4152662  |
| 244526_at    | up   | RASGRP3          | 1.3843083  |
| 49306_at     | up   | RASSF4           | 1.2583784  |
| 1554834_a_at | up   | RASSF5           | 1.7692351  |
| 229147_at    | down | RASSF6           | -1.2008153 |
| 220680_at    | down | RAVER2           | -1.2555538 |
| 244872_at    | up   | RBBP4            | 1.2970577  |
| 205296_at    | down | RBL1             | -1.2286828 |
| 212332_at    | up   | RBL2             | 1.3096447  |
| 1555639_a_at | up   | RBM14            | 1.2185898  |
| 212030_at    | up   | RBM25            | 1.2497025  |
| 227355_at    | up   | RBM26            | 1.2677643  |
| 243295_at    | up   | RBM27            | 1.2368121  |
| 229540_at    | up   | RBPJ             | 1.3988622  |
| 238421_at    | up   | RC3H2            | 1.3498273  |
| 215253_s_at  | up   | RCAN1            | 1.3321257  |
| 215747_s_at  | up   | RCC1             | 1.2344323  |
| 231290_at    | up   | RCCD1            | 1.2373477  |
| 1552378_s_at | up   | RDH10            | 1.2376839  |
| 217042_at    | up   | RDH11            | 1.2581693  |
| 228815_s_at  | down | REPIN1           | -1.2646469 |
| 203696_s_at  | down | RFC2             | -1.200967  |
| 218430_s_at  | up   | RFX7             | 1.2080417  |
| 208492_at    | up   | RFXAP            | 1.2934612  |
| 232053_x_at  | up   | RHBDD2           | 1.3001236  |
| 1554586_a_at | up   | RHOBTB2          | 1.2027346  |
| 225202_at    | down | RHOBTB3          | -1.2068317 |
| 1552734_at   | up   | RICTOR           | 1.290041   |
| 241820_at    | up   | RIF1             | 1.5660197  |
| 226164_x_at  | up   | RIMKLB           | 1.218177   |
| 227644_at    | down | RIMS4            | -1.2290297 |
| 202129_s_at  | up   | RIOK3            | 1.3536125  |
| 239843_at    | up   | RIT1             | 1.4179438  |
| 241343_at    | up   | RNASEH1          | 1.3129164  |
| 1568665_at   | up   | RNF103           | 1.240279   |
| 221430_s_at  | up   | RNF146           | 1.2100194  |
| 213038_at    | down | RNF19B           | -1.28376   |
| 244591_x_at  | down | RNF207           | -1.2251945 |
| 221194_s_at  | up   | RNFT1            | 1.2375506  |
| 211849_s_at  | up   | RNGTT            | 1.2514795  |
| 226975_at    | up   | RNPC3            | 1.2758292  |
| 235854_x_at  | up   | ROCK1            | 1.2846856  |
| 227849_at    | down | RP9              | -1.3087299 |
| 1555202_a_at | up   | RPRD1A           | 1.2812835  |
| 1566720_at   | up   | RPS10P7          | 1.2844806  |
| 241241_at    | up   | RPS14            | 1.202032   |
| 218909_at    | down | RPS6KC1          | -1.2025446 |
| 201203_s_at  | up   | RRBP1            | 1.3286365  |
| 230952_at    | down | RRN3P2           | -1.2034118 |
| 214764_at    | down | RRP15            | -1.2728981 |
| 1554012_at   | down | RSPO2            | -1.2520705 |

|              |      |                       |            |
|--------------|------|-----------------------|------------|
| 216976_s_at  | up   | RYK                   | 1.2388287  |
| 1553411_s_at | down | SALL3                 | -1.2206621 |
| 233001_at    | up   | SAMD10                | 1.3059096  |
| 1569599_at   | up   | SAMSN1                | 1.3768791  |
| 210790_s_at  | up   | SAR1A                 | 1.2145623  |
| 234536_at    | down | SARDH                 | -1.2055428 |
| 231895_at    | down | SASS6                 | -1.2071501 |
| 213435_at    | down | SATB2                 | -1.2463737 |
| 206667_s_at  | up   | SCAMP1                | 1.818395   |
| 201646_at    | up   | SCARB2                | 1.3623428  |
| 239454_at    | down | SCARF2                | -1.2787607 |
| 217600_at    | up   | SCUBE3                | 1.2554878  |
| 214166_at    | up   | SDHB                  | 1.3223996  |
| 237598_at    | down | SEC1                  | -1.3342972 |
| 224470_at    | up   | SEC22C                | 1.3926569  |
| 216392_s_at  | up   | SEC23IP               | 1.2186832  |
| 209889_at    | up   | SEC31B                | 1.2235045  |
| 222385_x_at  | up   | SEC61A1               | 1.2277613  |
| 208942_s_at  | down | SEC62                 | -1.2364924 |
| 230265_at    | up   | SEL1L                 | 2.1871579  |
| 223610_at    | up   | SEMA5B                | 1.2528108  |
| 223449_at    | up   | SEMA6A                | 1.2717769  |
| 1552812_a_at | up   | SENP1                 | 1.4154449  |
| 1569974_x_at | down | SEPT7P2               | -1.2163311 |
| 212268_at    | up   | SERPINB1              | 1.2601981  |
| 210172_at    | up   | SF1                   | 1.6793821  |
| 202036_s_at  | down | SFRP1                 | -1.2926308 |
| 202773_s_at  | up   | SFSWAP                | 1.3958496  |
| 214354_x_at  | up   | SFTPFB                | 1.3084375  |
| 220008_at    | up   | SGK269                | 1.2009856  |
| 235425_at    | down | SGOL2                 | -1.2952648 |
| 227923_at    | up   | SHANK3                | 1.2362424  |
| 219493_at    | down | SHCBP1                | -1.3287972 |
| 1552806_a_at | up   | SIGLEC10 /// SIGLEC12 | 1.2042744  |
| 1552911_at   | up   | SIGLEC11              | 1.2368029  |
| 208078_s_at  | down | SIK1                  | -1.2145748 |
| 238006_at    | down | SIN3A                 | -1.2486405 |
| 242129_at    | up   | SIN3B                 | 1.2242844  |
| 228347_at    | down | SIX1                  | -1.205419  |
| 217640_x_at  | down | SKA1                  | -1.2202777 |
| 203626_s_at  | up   | SKP2                  | 1.3183829  |
| 224854_s_at  | up   | SLAIN2                | 1.4008476  |
| 234306_s_at  | up   | SLAMF7                | 1.3527923  |
| 220740_s_at  | up   | SLC12A6               | 1.2041407  |
| 225043_at    | up   | SLC15A4               | 1.3279849  |
| 1557918_s_at | up   | SLC16A1               | 1.3504031  |
| 202856_s_at  | up   | SLC16A3               | 1.2586629  |
| 206599_at    | down | SLC16A5               | -1.2317543 |
| 206396_at    | up   | SLC1A1                | 1.2255124  |
| 237741_at    | up   | SLC25A36              | 1.3550351  |
| 218136_s_at  | up   | SLC25A37              | 1.3462328  |
| 231187_at    | down | SLC28A1               | -1.2183646 |
| 204429_s_at  | up   | SLC2A5                | 1.3449061  |
| 239596_at    | up   | SLC30A7               | 1.2320589  |
| 207439_s_at  | up   | SLC35A2               | 1.3793849  |
| 238347_at    | down | SLC38A10              | -1.2498363 |
| 220413_at    | up   | SLC39A2               | 1.2097262  |
| 1556551_s_at | up   | SLC39A6               | 1.324786   |
| 216504_s_at  | up   | SLC39A8               | 1.4625964  |
| 243894_at    | up   | SLC41A2               | 1.2238272  |
| 210692_s_at  | up   | SLC43A3               | 1.2657751  |

|              |      |          |            |
|--------------|------|----------|------------|
| 213167_s_at  | up   | SLC5A3   | 1.3581944  |
| 214860_at    | up   | SLC9A7   | 1.3646177  |
| 1553315_at   | up   | SLFNL1   | 1.3791132  |
| 224149_x_at  | up   | SLMAP    | 1.4679229  |
| 222441_x_at  | up   | SLMO2    | 1.2856749  |
| 213565_s_at  | down | SMAD6    | -1.2128699 |
| 212257_s_at  | up   | SMARCA2  | 1.5270525  |
| 217656_at    | up   | SMARCA4  | 1.2888131  |
| 1558747_at   | up   | SMCHD1   | 1.418564   |
| 238434_at    | up   | SMCR8    | 1.2463514  |
| 201793_x_at  | up   | SMG7     | 1.3407514  |
| 205309_at    | up   | SMPDL3B  | 1.4094319  |
| 209427_at    | down | SMTN     | -1.2547399 |
| 209131_s_at  | up   | SNAP23   | 1.5971612  |
| 1566403_at   | up   | SNORA68  | 1.2123123  |
| 226438_at    | down | SNTB1    | -1.2145936 |
| 220140_s_at  | up   | SNX11    | 1.2068441  |
| 229045_at    | up   | SNX20    | 1.22107    |
| 201085_s_at  | up   | SON      | 1.4134407  |
| 217576_x_at  | up   | SOS2     | 1.2219704  |
| 204432_at    | down | SOX12    | -1.2580765 |
| 1553685_s_at | up   | SP1      | 2.0792925  |
| 239743_at    | down | SP8      | -1.2185072 |
| 219888_at    | up   | SPAG4    | 1.2389477  |
| 229075_at    | down | SPATA5   | -1.20239   |
| 214403_x_at  | down | SPDEF    | -1.288168  |
| 216119_s_at  | down | SPEF1    | -1.2985827 |
| 201996_s_at  | up   | SPEN     | 1.3673474  |
| 219257_s_at  | up   | SPHK1    | 1.207213   |
| 244439_at    | up   | SPRED1   | 1.2163281  |
| 208539_x_at  | down | SPRR2B   | -1.261287  |
| 232082_x_at  | down | SPRR3    | -1.3679508 |
| 224144_at    | down | SPTBN4   | -1.2943119 |
| 202278_s_at  | up   | SPTLC1   | 1.2286109  |
| 1557352_at   | up   | SQLE     | 1.5077261  |
| 244804_at    | up   | SQSTM1   | 1.220337   |
| 1553581_s_at | down | SREK1IP1 | -1.2559975 |
| 1568957_x_at | up   | SRGAP2P1 | 1.2570063  |
| 202199_s_at  | up   | SRPK1    | 1.2542448  |
| 216639_at    | down | SRPX2    | -1.2295233 |
| 208610_s_at  | up   | SRRM2    | 1.2696333  |
| 201742_x_at  | up   | SRSF1    | 1.3683664  |
| 213742_at    | down | SRSF11   | -1.2527901 |
| 212266_s_at  | up   | SRSF5    | 1.2475252  |
| 223635_s_at  | down | SSBP3    | -1.2413251 |
| 200890_s_at  | up   | SSR1     | 1.2888123  |
| 217790_s_at  | up   | SSR3     | 1.2095879  |
| 214555_at    | down | SSTR5    | -1.3298289 |
| 214971_s_at  | up   | ST6GAL1  | 1.4594728  |
| 207524_at    | up   | ST7      | 1.2825435  |
| 209622_at    | up   | STK16    | 1.2114447  |
| 215505_s_at  | up   | STRN3    | 1.60572    |
| 203768_s_at  | up   | STS      | 1.2445357  |
| 226655_at    | up   | STX17    | 1.3695139  |
| 230691_at    | up   | STX1B    | 1.2003728  |
| 235180_at    | up   | STYX     | 1.267792   |
| 237784_at    | up   | SUB1     | 1.5253067  |
| 207601_at    | up   | SULT1B1  | 1.2181348  |
| 240200_at    | up   | SULT1C2  | 1.2146759  |
| 233827_s_at  | up   | SUPT16H  | 1.4232175  |
| 216271_x_at  | up   | SYDE1    | 1.3616     |

|              |      |          |            |
|--------------|------|----------|------------|
| 242774_at    | up   | SYNE2    | 2.3912773  |
| 215860_at    | down | SYT12    | -1.2480085 |
| 205966_at    | up   | TAF13    | 1.3606119  |
| 202840_at    | up   | TAF15    | 1.355117   |
| 1553528_a_at | down | TAF5     | -1.2176661 |
| 221618_s_at  | up   | TAF9B    | 1.7934484  |
| 242388_x_at  | up   | TAGAP    | 1.211516   |
| 1555565_s_at | up   | TAPBP    | 1.3154305  |
| 1564883_a_at | down | TAS1R1   | -1.213903  |
| 234042_at    | up   | TAS2R45  | 1.2266921  |
| 213913_s_at  | down | TBC1D30  | -1.2710199 |
| 222634_s_at  | up   | TBL1XR1  | 1.319699   |
| 1553132_a_at | down | TC2N     | -1.220804  |
| 226388_at    | up   | TCEA3    | 1.2056544  |
| 202371_at    | down | TCEAL4   | -1.2451591 |
| 1553635_s_at | down | TCTEX1D1 | -1.261144  |
| 202719_s_at  | up   | TES      | 1.209044   |
| 221035_s_at  | up   | TEX14    | 1.2990773  |
| 205688_at    | down | TFAP4    | -1.2406025 |
| 215863_at    | down | TFR2     | -1.3023049 |
| 233983_at    | up   | TGM6     | 1.2137678  |
| 203833_s_at  | up   | TGOLN2   | 1.4449682  |
| 235653_s_at  | up   | THAP6    | 1.2576196  |
| 209419_at    | up   | THOC5    | 1.5055614  |
| 222439_s_at  | up   | THRAP3   | 1.4155089  |
| 229758_at    | down | TIGD5    | -1.2184504 |
| 235765_at    | up   | TLE4     | 1.3426694  |
| 220639_at    | down | TM4SF20  | -1.239756  |
| 204426_at    | up   | TMED2    | 1.3311411  |
| 224496_s_at  | up   | TMEM107  | 1.4161645  |
| 1564067_x_at | down | TMEM151B | -1.3088908 |
| 213272_s_at  | up   | TMEM159  | 1.4152834  |
| 228671_at    | down | TMEM201  | -1.255594  |
| 226647_at    | up   | TMEM25   | 1.2335995  |
| 232591_s_at  | up   | TMEM30A  | 1.2167075  |
| 222736_s_at  | up   | TMEM38B  | 1.4124749  |
| 219462_at    | up   | TMEM53   | 1.2220973  |
| 226083_at    | down | TMEM70   | -1.3651098 |
| 242103_at    | up   | TMEM86A  | 1.2434255  |
| 225412_at    | up   | TMEM87B  | 1.2428396  |
| 232941_at    | down | TMPRSS6  | -1.3270667 |
| 208097_s_at  | up   | TMX1     | 1.6823621  |
| 202510_s_at  | up   | TNFAIP2  | 1.2287173  |
| 222562_s_at  | up   | TNKS2    | 1.684256   |
| 210585_s_at  | up   | TNPO2    | 1.3838719  |
| 234734_s_at  | down | TNRC6A   | -1.2421542 |
| 228998_at    | up   | TNRC6B   | 1.2436055  |
| 208900_s_at  | up   | TOP1     | 1.2583352  |
| 216100_s_at  | up   | TOR1AIP1 | 1.4923571  |
| 201683_x_at  | up   | TOX4     | 1.3020196  |
| 1569098_s_at | up   | TP53BP1  | 1.2252831  |
| 211194_s_at  | up   | TP63     | 1.5798955  |
| 231978_at    | up   | TPCN2    | 1.2877588  |
| 238065_at    | down | TPM3     | -1.3146789 |
| 218876_at    | down | TPPP3    | -1.2144017 |
| 215220_s_at  | up   | TPR      | 1.789101   |
| 213575_at    | up   | TRA2A    | 1.4068787  |
| 201399_s_at  | up   | TRAM1    | 1.4255743  |
| 234440_at    | down | TRDV3    | -1.2984595 |
| 219937_at    | down | TRHDE    | -1.2900738 |
| 202479_s_at  | up   | TRIB2    | 1.2289041  |

|              |      |         |            |
|--------------|------|---------|------------|
| 210995_s_at  | up   | TRIM23  | 1.2798948  |
| 225868_at    | down | TRIM47  | -1.2430952 |
| 1568594_s_at | up   | TRIM52  | 1.208695   |
| 235476_at    | up   | TRIM59  | 1.3533504  |
| 208178_x_at  | up   | TRIO    | 1.2142777  |
| 1568596_a_at | down | TROAP   | -1.2470404 |
| 210438_x_at  | down | TROVE2  | -1.2332542 |
| 208589_at    | down | TRPC7   | -1.2523592 |
| 234351_x_at  | up   | TRPS1   | 1.3097113  |
| 222855_s_at  | up   | TRPV2   | 1.2624544  |
| 214908_s_at  | up   | TRRAP   | 1.3985238  |
| 235447_at    | up   | TRUB1   | 1.2014401  |
| 208763_s_at  | up   | TSC22D3 | 1.3510768  |
| 227610_at    | up   | TSPAN11 | 1.2390826  |
| 242595_at    | down | TSSK4   | -1.2497983 |
| 1569472_s_at | up   | TTC3    | 2.0169203  |
| 208099_x_at  | down | TTLL5   | -1.22137   |
| 228883_at    | up   | TUB     | 1.2046323  |
| 215739_s_at  | up   | TUBGCP3 | 1.230523   |
| 214007_s_at  | up   | TWF1    | 1.4828343  |
| 219969_at    | up   | TXLNG   | 1.2185957  |
| 201008_s_at  | up   | TXNIP   | 1.474721   |
| 202954_at    | down | UBE2C   | -1.2116129 |
| 209041_s_at  | up   | UBE2G2  | 1.2502512  |
| 217799_x_at  | up   | UBE2H   | 1.2914091  |
| 225179_at    | up   | UBE2K   | 1.3215816  |
| 212404_s_at  | up   | UBE3B   | 1.2354816  |
| 202316_x_at  | up   | UBE4B   | 1.431709   |
| 243916_x_at  | down | UBLCP1  | -1.3228263 |
| 209088_s_at  | up   | UBN1    | 1.2053555  |
| 212008_at    | up   | UBXN4   | 1.3866497  |
| 217100_s_at  | up   | UBXN7   | 1.2896739  |
| 221765_at    | up   | UGCG    | 1.588019   |
| 1552656_s_at | up   | UHMK1   | 1.444792   |
| 202707_at    | up   | UMPS    | 1.2337593  |
| 225869_s_at  | up   | UNC93B1 | 1.2116233  |
| 208947_s_at  | up   | UPF1    | 1.3120805  |
| 202412_s_at  | up   | USP1    | 1.2643702  |
| 209136_s_at  | up   | USP10   | 1.2028841  |
| 1552678_a_at | up   | USP28   | 1.2405721  |
| 212065_s_at  | up   | USP34   | 1.4104941  |
| 224979_s_at  | down | USP36   | -1.2450577 |
| 226729_at    | down | USP37   | -1.2221959 |
| 244133_at    | up   | USP49   | 1.2217152  |
| 242242_at    | up   | USP6    | 1.2613249  |
| 238561_s_at  | up   | UTP23   | 1.3668115  |
| 218169_at    | down | VAC14   | -1.2132423 |
| 226029_at    | down | VANGL2  | -1.2071311 |
| 202549_at    | up   | VAPB    | 1.2119246  |
| 208844_at    | down | VDAC3   | -1.3201733 |
| 235237_at    | up   | VMA21   | 1.295458   |
| 1558549_s_at | down | VNN1    | -1.2886419 |
| 231585_at    | down | VPS13A  | -1.2454926 |
| 1553852_at   | down | VPS13B  | -1.2053165 |
| 232386_at    | up   | VPS13C  | 1.3182617  |
| 244400_at    | down | VPS33A  | -1.2361475 |
| 222387_s_at  | up   | VPS35   | 1.5461305  |
| 219679_s_at  | up   | WAC     | 1.468996   |
| 224563_at    | up   | WASF2   | 1.3752091  |
| 205809_s_at  | up   | WASL    | 1.3241796  |
| 203597_s_at  | down | WBP4    | -1.2457443 |

|              |      |         |            |
|--------------|------|---------|------------|
| 1554410_a_at | up   | WBSCR16 | 1.3194683  |
| 228326_at    | up   | WDR27   | 1.2001189  |
| 209216_at    | down | WDR45   | -1.2053094 |
| 228295_at    | up   | WDR59   | 1.3030602  |
| 1570033_at   | down | WIPI2   | -1.2018325 |
| 211993_at    | up   | WNK1    | 1.3538823  |
| 229547_s_at  | down | WNK2    | -1.2346348 |
| 201295_s_at  | up   | WSB1    | 1.5458132  |
| 1560274_at   | up   | WTAP    | 1.4658818  |
| 218110_at    | down | XAB2    | -1.2017821 |
| 1555785_a_at | up   | XRN1    | 1.2922058  |
| 231550_at    | up   | XYLT2   | 1.2105894  |
| 200641_s_at  | up   | YWHAZ   | 1.275037   |
| 243648_at    | up   | ZBED6   | 1.7465087  |
| 226284_at    | down | ZBTB2   | -1.2484276 |
| 1554973_a_at | up   | ZBTB26  | 1.3215235  |
| 223953_s_at  | up   | ZBTB37  | 1.2880547  |
| 230754_at    | down | ZBTB38  | -1.2643255 |
| 229691_at    | down | ZBTB42  | -1.273353  |
| 213303_x_at  | down | ZBTB7A  | -1.2313094 |
| 205787_x_at  | up   | ZC3H11A | 1.2317656  |
| 226897_s_at  | up   | ZC3H7A  | 1.4115872  |
| 1556967_at   | up   | ZDHHC14 | 1.5948302  |
| 212758_s_at  | up   | ZEB1    | 1.2435546  |
| 234455_at    | down | ZFP1    | -1.2003193 |
| 224631_at    | up   | ZFP91   | 1.3623356  |
| 203730_s_at  | up   | ZKSCAN5 | 1.2241715  |
| 1555609_a_at | up   | ZMAT3   | 1.728943   |
| 232508_at    | down | ZMIZ1   | -1.202388  |
| 210282_at    | up   | ZMYM2   | 1.4444937  |
| 243814_at    | up   | ZMYND8  | 1.218426   |
| 1567032_s_at | up   | ZNF160  | 1.2833675  |
| 1558184_s_at | down | ZNF17   | -1.2054374 |
| 207164_s_at  | up   | ZNF238  | 1.3226553  |
| 228185_at    | up   | ZNF25   | 1.20233    |
| 241720_at    | up   | ZNF326  | 1.2385306  |
| 220117_at    | down | ZNF385D | -1.2603899 |
| 232117_at    | down | ZNF471  | -1.2525529 |
| 228138_at    | up   | ZNF498  | 1.2042183  |
| 1558995_at   | up   | ZNF547  | 1.3093116  |
| 1556187_at   | up   | ZNF555  | 1.3690343  |
| 228305_at    | up   | ZNF565  | 1.2549423  |
| 212620_at    | up   | ZNF609  | 1.2321737  |
| 227045_at    | down | ZNF614  | -1.3506169 |
| 1554249_a_at | up   | ZNF638  | 1.2135195  |
| 235179_at    | up   | ZNF641  | 1.2808677  |
| 1554726_at   | up   | ZNF655  | 1.573      |
| 222760_at    | down | ZNF703  | -1.2891688 |
| 235079_at    | down | ZNF704  | -1.2210963 |
| 238606_at    | down | ZNF747  | -1.2295533 |
| 239441_at    | down | ZNF780A | -1.2400992 |
| 227101_at    | up   | ZNF800  | 1.5563715  |
| 228130_at    | up   | ZSCAN30 | 1.386811   |
| 217592_at    | up   | ZSWIM1  | 1.2098714  |
| 227918_s_at  | up   | ZYG11B  | 1.322702   |

**Table S3: GSEA "Aggressive multiple myeloma" signature**

| PROBE            | GENE SYMBOL          | GENE TITLE                                                           | RANK IN GENE LIST | RANK METRIC SCORE | RUNNING ES | CORE ENRICHMENT |
|------------------|----------------------|----------------------------------------------------------------------|-------------------|-------------------|------------|-----------------|
| KIF14            | <i>KIF14</i>         | kinesin family member 14                                             | 3                 | 0.751             | 0.0594     | Yes             |
| CENB1            | <i>CENB1</i>         | cyclin B1                                                            | 5                 | 0.727             | 0.1171     | Yes             |
| DEPDC1B          | <i>DEPDC1B</i>       | DEP domain containing 1B                                             | 20                | 0.652             | 0.1681     | Yes             |
| ASPM             | <i>ASPM</i>          | asp (abnormal spindle) homolog, microcephaly associated (Drosophila) | 97                | 0.544             | 0.2075     | Yes             |
| UBE2C            | <i>UBE2C</i>         | ubiquitin-conjugating enzyme E2C                                     | 119               | 0.521             | 0.2478     | Yes             |
| NEK2             | <i>NEK2</i>          | NIMA (never in mitosis gene a)-related kinase 2                      | 328               | 0.432             | 0.2720     | Yes             |
| C18ORF24         | <i>C18ORF24</i>      | chromosome 18 open reading frame 24                                  | 340               | 0.430             | 0.3055     | Yes             |
| FOXM1            | <i>FOXM1</i>         | forkhead box M1                                                      | 501               | 0.394             | 0.3290     | Yes             |
| SLC19A1          | <i>SLC19A1</i>       | solute carrier family 19 (folate transporter), member 1              | 547               | 0.386             | 0.3575     | Yes             |
| MAGEA3           | <i>MAGEA3</i>        | melanoma antigen family A, 3                                         | 675               | 0.370             | 0.3806     | Yes             |
| SPBC25           | <i>SPBC25</i>        | spindle pole body component 25 homolog (S. cerevisiae)               | 762               | 0.359             | 0.4049     | Yes             |
| AURKA            | <i>AURKA</i>         | aurora kinase A                                                      | 794               | 0.356             | 0.4317     | Yes             |
| CDCA1            | <i>CDCA1</i>         | cell division cycle associated 1                                     | 861               | 0.348             | 0.4561     | Yes             |
| BIRC5            | <i>BIRC5</i>         | baculoviral IAP repeat-containing 5 (survivin)                       | 1039              | 0.330             | 0.4737     | Yes             |
| TTK              | <i>TTK</i>           | TTK protein kinase                                                   | 1061              | 0.328             | 0.4987     | Yes             |
| TOP2A            | <i>TOP2A</i>         | topoisomerase (DNA) II alpha 170kDa                                  | 1262              | 0.312             | 0.5137     | Yes             |
| DLG7             | <i>DLG7</i>          | discs, large homolog 7 (Drosophila)                                  | 1304              | 0.309             | 0.5362     | Yes             |
| UBE2T            | <i>UBE2T</i>         | ubiquitin-conjugating enzyme E2T (putative)                          | 1437              | 0.300             | 0.5536     | Yes             |
| LOC652689/FAM72A | <i>not available</i> |                                                                      | 1813              | 0.276             | 0.5573     | Yes             |
| ZWILCH           | <i>ZWILCH</i>        | Zwilch, kinetochore associated, homolog (Drosophila)                 | 2068              | 0.261             | 0.5656     | Yes             |
| GAGE1/GAGE2      | <i>not available</i> |                                                                      | 2088              | 0.260             | 0.5853     | Yes             |
| MAGEA1           | <i>MAGEA1</i>        | melanoma antigen family A, 1 (directs expression of antigen MZ2-E)   | 2155              | 0.257             | 0.6025     | Yes             |
| BUB1B            | <i>BUB1B</i>         | BUB1 budding uninhibited by benzimidazoles 1 homolog beta (yeast)    | 2341              | 0.249             | 0.6132     | Yes             |
| SPBC24           | <i>SPBC24</i>        | spindle pole body component 24 homolog (S. cerevisiae)               | 2596              | 0.237             | 0.6196     | Yes             |
| MAGEA6           | <i>MAGEA6</i>        | melanoma antigen family A, 6                                         | 3708              | 0.194             | 0.5810     | Yes             |
| E2F8             | <i>E2F8</i>          | E2F transcription factor 8                                           | 3781              | 0.191             | 0.5926     | Yes             |
| DCC1             | <i>not available</i> |                                                                      | 3913              | 0.187             | 0.6011     | Yes             |
| MCM10            | <i>MCM10</i>         | MCM10 minichromosome maintenance deficient 10 (S. cerevisiae)        | 3995              | 0.185             | 0.6119     | Yes             |
| CCDC34           | <i>CCDC34</i>        | coiled-coil domain containing 34                                     | 4039              | 0.184             | 0.6244     | Yes             |
| TRIP13           | <i>TRIP13</i>        | thyroid hormone receptor interactor 13                               | 4150              | 0.181             | 0.6333     | Yes             |
| RFC4             | <i>RFC4</i>          | replication factor C (activator 1) 4, 37kDa                          | 4317              | 0.176             | 0.6392     | Yes             |
| PRC1             | <i>PRC1</i>          | protein regulator of cytokinesis 1                                   | 4353              | 0.175             | 0.6513     | Yes             |
| TYMS             | <i>TYMS</i>          | thymidylate synthetase                                               | 4523              | 0.170             | 0.6566     | Yes             |
| TPX2             | <i>TPX2</i>          | TPX2, microtubule-associated, homolog (Xenopus laevis)               | 5070              | 0.154             | 0.6422     | Yes             |
| KIAA1794         | <i>KIAA1794</i>      | KIAA1794                                                             | 5203              | 0.150             | 0.6477     | Yes             |
| CDC2             | <i>CDC2</i>          | cell division cycle 2, G1 to S and G2 to M                           | 5245              | 0.149             | 0.6575     | Yes             |



**Table S4:** GSEA "CD40 dependant B cell" signature

| PROBE    | GENE SYMBOL     | GENE_TITLE                                                                              | RANK IN GENE LIST | RANK METRIC SCORE | RUNNING ES | CORE ENRICHMENT |
|----------|-----------------|-----------------------------------------------------------------------------------------|-------------------|-------------------|------------|-----------------|
| NFKB2    | <i>NFKB2</i>    | nuclear factor of kappa light polypeptide gene enhancer in B-cells 2 (p49/p100)         | 20573             | -0.743            | 0.0016     | Yes             |
| NCKAP1L  | <i>NCKAP1L</i>  | NCK-associated protein 1-like                                                           | 20563             | -0.706            | -0.0373    | Yes             |
| TNFAIP2  | <i>TNFAIP2</i>  | tumor necrosis factor, alpha-induced protein 2                                          | 20470             | -0.517            | -0.0702    | Yes             |
| CD40     | <i>CD40</i>     | CD40 molecule, TNF receptor superfamily member 5                                        | 20467             | -0.515            | -0.0975    | Yes             |
| CCR7     | <i>CCR7</i>     | chemokine (C-C motif) receptor 7                                                        | 20438             | -0.495            | -0.1233    | Yes             |
| CD83     | <i>CD83</i>     | CD83 molecule                                                                           | 20429             | -0.490            | -0.1491    | Yes             |
| DUSP2    | <i>DUSP2</i>    | dual specificity phosphatase 2                                                          | 20415             | -0.481            | -0.1744    | Yes             |
| HTR3A    | <i>HTR3A</i>    | 5-hydroxytryptamine (serotonin) receptor 3A                                             | 20267             | -0.423            | -0.1927    | Yes             |
| SLAMF1   | <i>SLAMF1</i>   | signaling lymphocytic activation molecule family member 1                               | 20177             | -0.395            | -0.2108    | Yes             |
| HLA-DQB1 | <i>HLA-DQB1</i> | major histocompatibility complex, class II, DQ beta 1                                   | 19998             | -0.363            | -0.2230    | Yes             |
| TNFAIP8  | <i>TNFAIP8</i>  | tumor necrosis factor, alpha-induced protein 8                                          | 19949             | -0.355            | -0.2398    | Yes             |
| TRIP10   | <i>TRIP10</i>   | thyroid hormone receptor interactor 10                                                  | 19874             | -0.343            | -0.2550    | Yes             |
| BCL2     | <i>BCL2</i>     | B-cell CLL/lymphoma 2                                                                   | 19667             | -0.316            | -0.2632    | Yes             |
| PHACTR1  | <i>PHACTR1</i>  | phosphatase and actin regulator 1                                                       | 19586             | -0.307            | -0.2760    | Yes             |
| FAIM3    | <i>FAIM3</i>    | Fas apoptotic inhibitory molecule 3                                                     | 19526             | -0.298            | -0.2893    | Yes             |
| MAP3K8   | <i>MAP3K8</i>   | mitogen-activated protein kinase kinase kinase 8                                        | 19506             | -0.296            | -0.3042    | Yes             |
| STAT5A   | <i>STAT5A</i>   | signal transducer and activator of transcription 5A                                     | 19496             | -0.295            | -0.3194    | Yes             |
| NFKBIA   | <i>NFKBIA</i>   | nuclear factor of kappa light polypeptide gene enhancer in B-cells inhibitor, alpha     | 19468             | -0.292            | -0.3337    | Yes             |
| DDIT4    | <i>DDIT4</i>    | DNA-damage-inducible transcript 4                                                       | 19443             | -0.290            | -0.3480    | Yes             |
| CFLAR    | <i>CFLAR</i>    | CASP8 and FADD-like apoptosis regulator                                                 | 19434             | -0.289            | -0.3630    | Yes             |
| CR2      | <i>CR2</i>      | complement component (3d/Epstein Barr virus) receptor 2                                 | 19401             | -0.286            | -0.3768    | Yes             |
| CCL4     | <i>CCL4</i>     | chemokine (C-C motif) ligand 4                                                          | 19304             | -0.278            | -0.3872    | Yes             |
| EBI2     | <i>EBI2</i>     | Epstein-Barr virus induced gene 2 (lymphocyte-specific G protein-coupled receptor)      | 19233             | -0.270            | -0.3985    | Yes             |
| UNC119   | <i>UNC119</i>   | unc-119 homolog (C. elegans)                                                            | 19195             | -0.267            | -0.4109    | Yes             |
| TNFAIP3  | <i>TNFAIP3</i>  | tumor necrosis factor, alpha-induced protein 3                                          | 18909             | -0.244            | -0.4112    | Yes             |
| LRRC32   | <i>LRRC32</i>   | leucine rich repeat containing 32                                                       | 18894             | -0.243            | -0.4234    | Yes             |
| ZFP36L1  | <i>ZFP36L1</i>  | zinc finger protein 36, C3H type-like 1                                                 | 18764             | -0.235            | -0.4300    | Yes             |
| ICAM1    | <i>ICAM1</i>    | intercellular adhesion molecule 1 (CD54), human rhinovirus receptor                     | 18745             | -0.233            | -0.4416    | Yes             |
| KRT7     | <i>KRT7</i>     | keratin 7                                                                               | 18666             | -0.228            | -0.4501    | Yes             |
| NEF3     | <i>NEF3</i>     | neurofilament 3 (150kDa medium)                                                         | 18243             | -0.204            | -0.4416    | Yes             |
| MEF2C    | <i>MEF2C</i>    | MADS box transcription enhancer factor 2, polypeptide C (myocyte enhancer factor 2C)    | 18204             | -0.201            | -0.4505    | Yes             |
| TRAF1    | <i>TRAF1</i>    | TNF receptor-associated factor 1                                                        | 17831             | -0.182            | -0.4430    | Yes             |
| PLEK     | <i>PLEK</i>     | pleckstrin                                                                              | 17794             | -0.180            | -0.4509    | Yes             |
| LYN      | <i>LYN</i>      | v-yes-1 Yamaguchi sarcoma viral related oncogene homolog                                | 17576             | -0.170            | -0.4498    | Yes             |
| NFKBIE   | <i>NFKBIE</i>   | nuclear factor of kappa light polypeptide gene enhancer in B-cells inhibitor, epsilon   | 17522             | -0.168            | -0.4563    | Yes             |
| RAC2     | <i>RAC2</i>     | ras-related C3 botulinum toxin substrate 2 (rho family, small GTP binding protein Rac2) | 17513             | -0.168            | -0.4648    | Yes             |
| SYNGR2   | <i>SYNGR2</i>   | synaptogyrin 2                                                                          | 17446             | -0.165            | -0.4704    | Yes             |
| TNF      | <i>TNF</i>      | tumor necrosis factor (TNF superfamily, member 2)                                       | 17428             | -0.165            | -0.4783    | Yes             |
| HLA-DRB1 | <i>HLA-DRB1</i> | Major histocompatibility complex, class II, DR beta 1                                   | 17296             | -0.158            | -0.4807    | Yes             |
| BLR1     | <i>BLR1</i>     | Burkitt lymphoma receptor 1, GTP binding protein (chemokine (C-X-C motif) receptor 5)   | 17189             | -0.154            | -0.4839    | Yes             |
| ARID5B   | <i>ARID5B</i>   | AT rich interactive domain 5B (MRF1-like)                                               | 17158             | -0.153            | -0.4905    | Yes             |
| GADD45B  | <i>GADD45B</i>  | growth arrest and DNA-damage-inducible, beta                                            | 16998             | -0.146            | -0.4908    | Yes             |
| PIK3CD   | <i>PIK3CD</i>   | phosphoinositide-3-kinase, catalytic, delta polypeptide                                 | 16885             | -0.141            | -0.4931    | Yes             |
| HLA-F    | <i>HLA-F</i>    | major histocompatibility complex, class I, F                                            | 16880             | -0.141            | -0.5004    | Yes             |
| TMC6     | <i>TMC6</i>     | transmembrane channel-like 6                                                            | 16866             | -0.141            | -0.5072    | Yes             |

**Table S5:** Oligonucleotides used for this study

**sh cloning**

| Duplex name      | Oligo Name | Sequence 5' to 3'                                                              |
|------------------|------------|--------------------------------------------------------------------------------|
| shCY1 = shCYCLON | Cyclonsh2F | CGTGTACCGGTCCGTCCTCAAGAAGTTGAATAAAGCTCGAGCTTTATTCAACTTCTTGGACGTTTTTGAATCCGTCGT |
|                  | Cyclonsh2R | ACGACGGAATTCAAAACGTCCAAGAAGTTGAATAAAGCTCGAGCTTTATTCAACTTCTTGGACGACCGGTACACG    |
| shCY2            | Cyclonsh3F | CGTGTACCGGTCCCCAGATGCTTCAGGACAAGCCTCGAGGCTTGTCCTGAAGCATCTGGGTTTTTGAATCCGTCGT   |
|                  | Cyclonsh3R | ACGACGGAATTCAAAACCCAGATGCTTCAGGACAAGCCTCGAGGCTTGTCCTGAAGCATCTGGGACCGGTACACG    |
| shCtrl           | CtrlshF    | CGTGTACCGGTCCCTAAGGTTAAGTCGCCCTCGCTCGAGCGAGGGCGACTTAACCTTAGGTTTTTGAATCCGTCGT   |
|                  | CtrlshR    | ACGACGGAATTCAAAACCTAAGGTTAAGTCGCCCTCGCTCGAGCGAGGGCGACTTAACCTTAGGACCGGTACACG    |

**q-PCR**

| Oligo Name | Sequence 5' to 3'    |
|------------|----------------------|
| CyclonF    | AGCGAAAAGGTTCTTCATCC |
| CyclonR    | TTCCTCTCCTGTCGTTCCCT |
